# Supplementary material for: Impacts of external fields on aromaticity and acidity of benzoic acid: a density functional theory, conceptual density functional theory and information-theoretic approach study
Source: Royal Society of Chemistry journal article supplement (doi:10.1039/d2cp04557e), 2022-12-13
Supplement: d2cp04557e1.pdf [file d2cp04557e1.pdf]

*Supplementary Information for*

**Impacts of External Fields on Aromaticity and Acidity for Benzoic Acid: A Density Functional Theory, Conceptual Density Functional Theory and Information-Theoretic Approach Study**

Meng Li,<sup>1#</sup> Xinjie Wan,<sup>1#</sup> Xin He,<sup>2</sup> Chunying Rong,<sup>1\*</sup> and Shubin Liu<sup>3,4\*</sup>

<sup>1</sup> *Key Laboratory of Chemical Biology and Traditional Chinese Medicine Research (Ministry of Education of China), Hunan Normal University, Changsha, Hunan 410081, P.R. China. E-mail: rongchunying@aliyun.com*

<sup>2</sup> *Qingdao Institute for Theoretical and Computational Sciences, Institute of Frontier and Interdisciplinary Science, Shandong University, Qingdao, Shandong 266237, P.R. China*

<sup>3</sup> *Research Computing Center, University of North Carolina, Chapel Hill, NC 27599-3420, USA. E-mail: shubin@email.unc.edu*

<sup>4</sup> *Department of Chemistry, University of North Carolina, Chapel Hill, NC 27599-3290, USA*

**This PDF file includes:**

1. Table S1. Figure S1-S16. Benchmark results for benzoic acid under electric field with 9 basis sets and 9 functionals/methods to examine the impact of the methodology dependence on the NICS(0) values.
2. Figure S17. Profiles of average C-C bond distance of the ring change as a function of the strength of the applied external electric field.
3. Figure S18-S19. Aromaticity results characterized by other indicators (such as NICS(1)<sub>zz</sub>, PDI, HOMA, FLU) of benzoic acid under the external electric field.
4. Figure S20-S21. Profiles of the molecular electrostatic potential (MEP) values and natural valence atomic orbital energy (NAO) values of the dissociating proton on benzoic acid (H1 in Scheme 1) as a function of the applied external electric field strength for p-fluorobenzoic acid and 3,5-difluorobenzoic acid in three directions.
5. Figure S22-S23. Predicted pK<sub>a</sub> values as a function of the applied external electric field strength for p-fluorobenzoic acid and 3,5-difluorobenzoic in three directions.
6. Figure S24-S25. Strong linear correlations of MEP values with NPA partial charges on both O<sub>1</sub> and H<sub>1</sub> atoms for p-fluorobenzoic acid and 3,5-difluorobenzoic when the external electric field is applied to any of the three directions.
7. The optimized molecular coordinates.

## 1. Benchmark Results

**Table S1** Benchmark tests for benzoic acid under electric field with 9 basis sets and 9 functionals/methods to examine the impact of the methodology dependence on the NICS(0) values.

| Functional     | Basis set    |
|----------------|--------------|
| B3LYP          | 6-311G(d)    |
| pw91pw91       | 6-311G(d,p)  |
| CAM-B3LYP      | 6-311+G(d)   |
| b3pw91         | 6-311+G(d,p) |
| pbepbe         | Def2SVPP     |
| tpsstpss       | Def2TZVP     |
| $\omega$ b97xd | cc-pVDZ      |
| M062X          | cc-pVTZ      |
| MP2            | aug-cc-pVTZ  |

*When basis sets were tested, the M062X functional was employed. When functionals were tested, 6-311+G(d) basis set was employed. Units in ppm.*

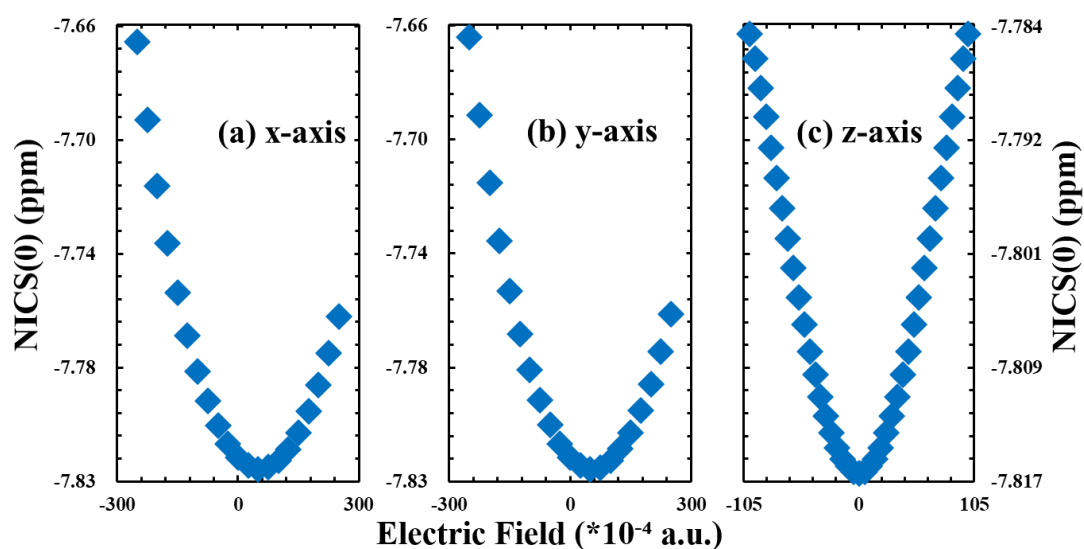

**Figure S1** Profiles of aromaticity index NICS(0) values at B3LYP/6-311+G(d) level as a function of the applied external electric field along (a) x-axis; (b) y-axis; and (c) z-axis directions.

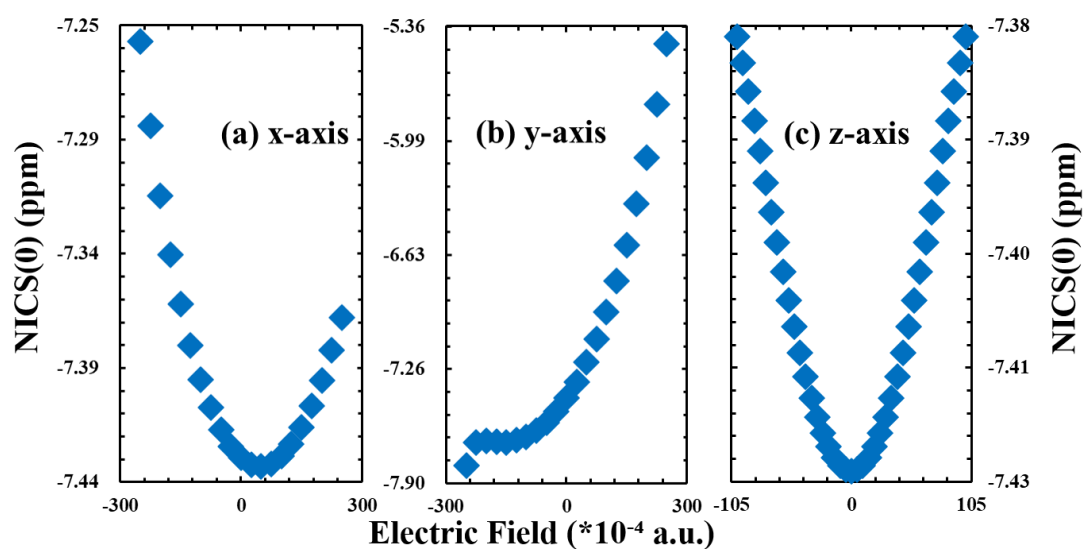

**Figure S2** Profiles of aromaticity index NICS(0) values at pw91pw91/6-311+G(d) level as a function of the applied external electric field along (a) x-axis; (b) y-axis; and (c) z-axis directions.

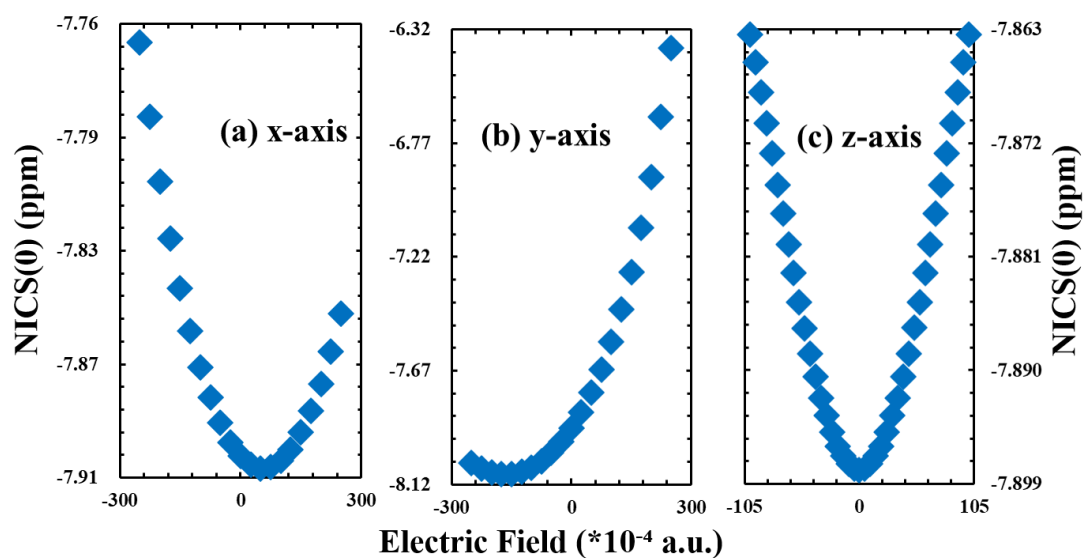

**Figure S3** Profiles of aromaticity index NICS(0) values at CAM-B3LYP/6-311+G(d) level as a function of the applied external electric field along (a) x-axis; (b) y-axis; and (c) z-axis directions.

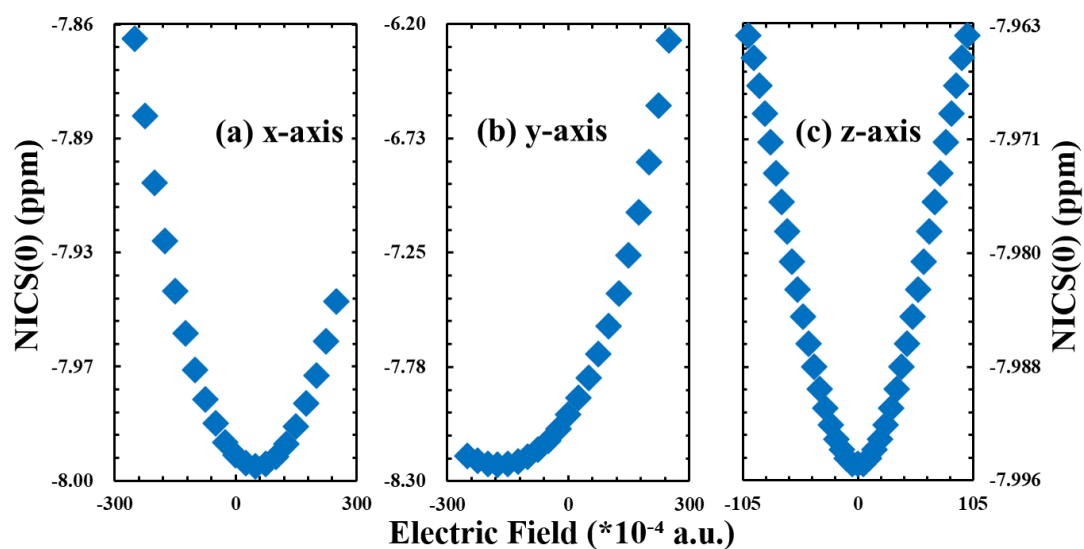

**Figure S4** Profiles of aromaticity index NICS(0) values at b3pw91/6-311+G(d) level as a function of the applied external electric field along (a) x-axis; (b) y-axis; and (c) z-axis directions.

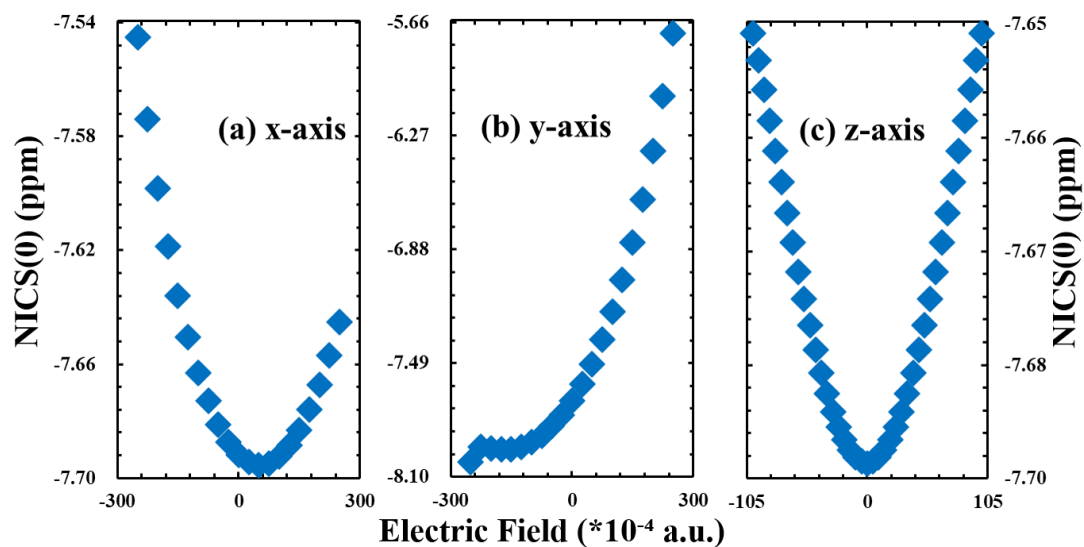

**Figure S5** Profiles of aromaticity index NICS(0) values at tpsstpss/6-311+G(d) level as a function of the applied external electric field along (a) x-axis; (b) y-axis; and (c) z-axis directions.

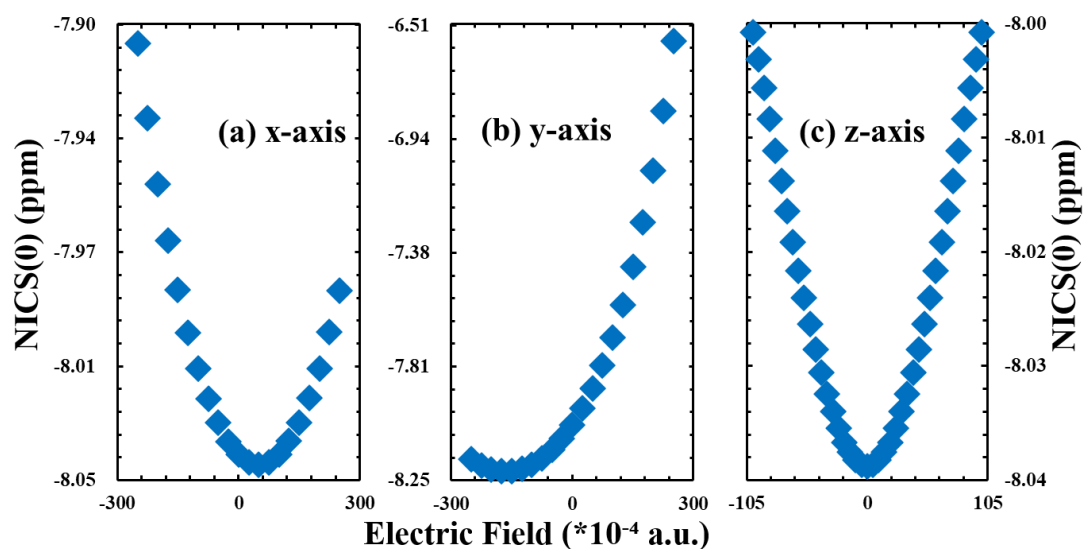

**Figure S6** Profiles of aromaticity index NICS(0) values at  $\omega$ b97xd/6-311+G(d) level as a function of the applied external electric field along (a) x-axis; (b) y-axis; and (c) z-axis directions.

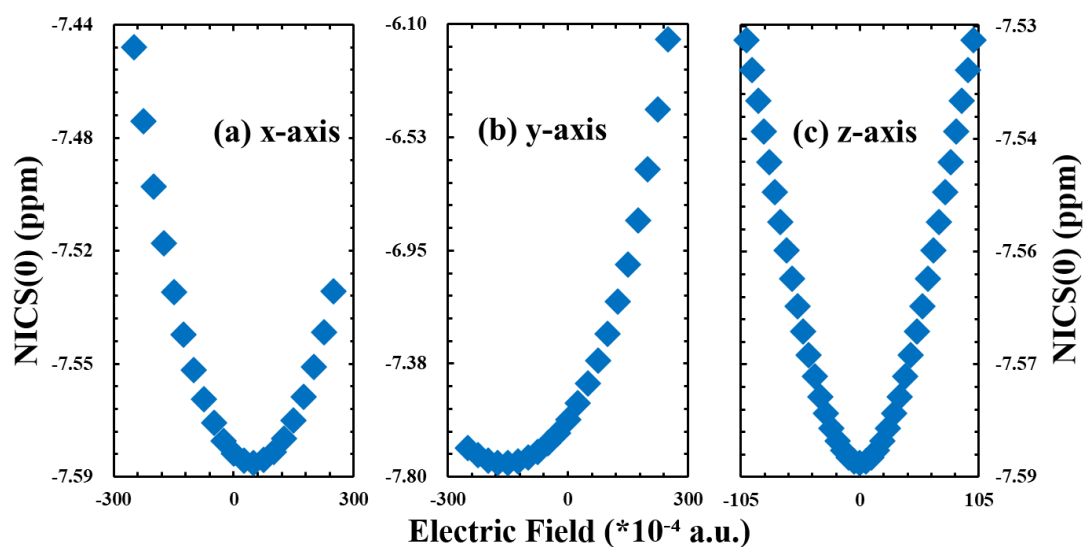

**Figure S7** Profiles of aromaticity index NICS(0) values at M062X/6-311+G(d) level as a function of the applied external electric field along (a) x-axis; (b) y-axis; and (c) z-axis directions.

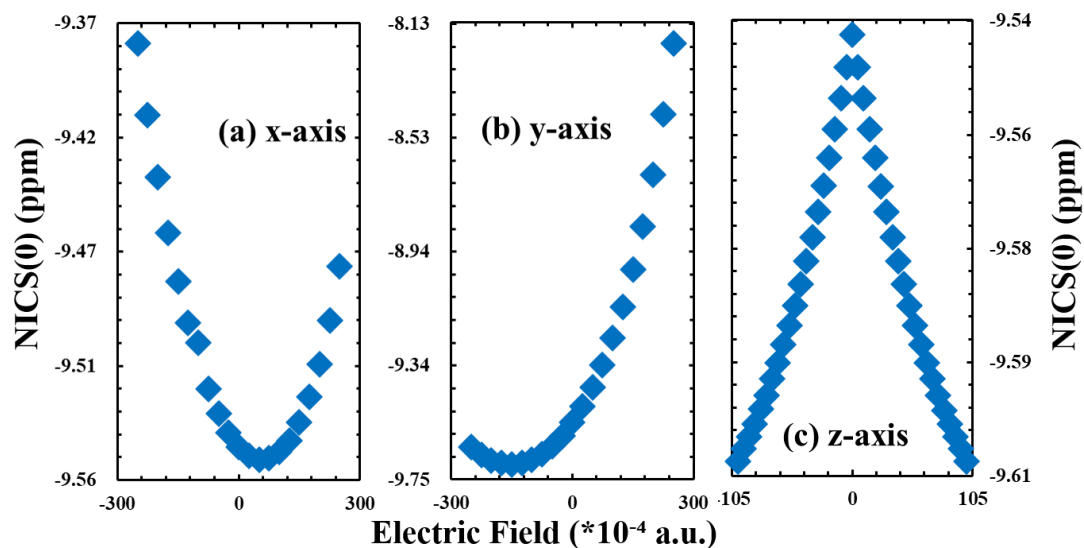

**Figure S8** Profiles of aromaticity index NICS(0) values at MP2/6-311+G(d) level as a function of the applied external electric field along (a) x-axis; (b) y-axis; and (c) z-axis directions.

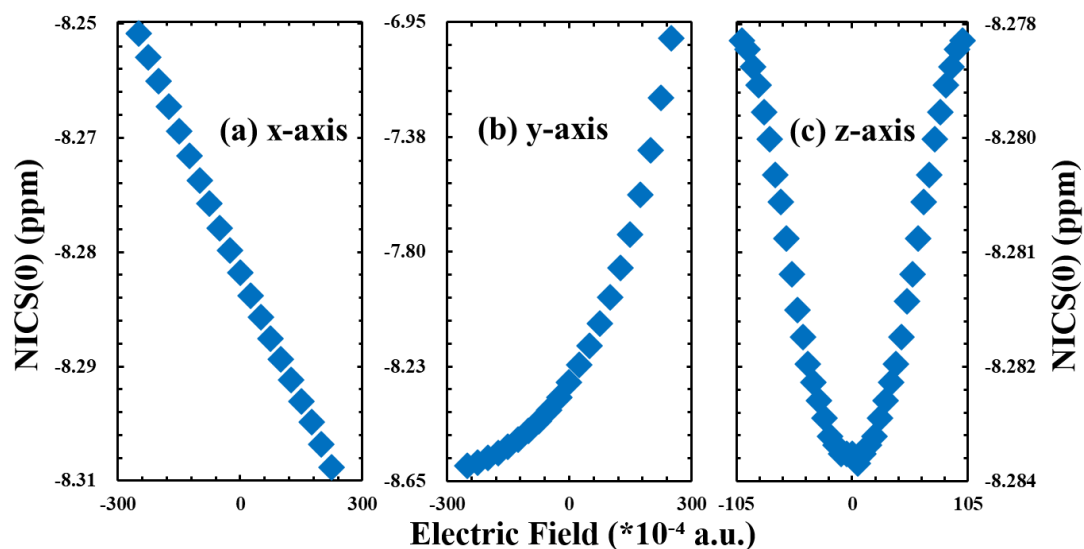

**Figure S9** NICS(0) values of calculated benzoic acid under the electric field at m062x/6-311G(d) level.

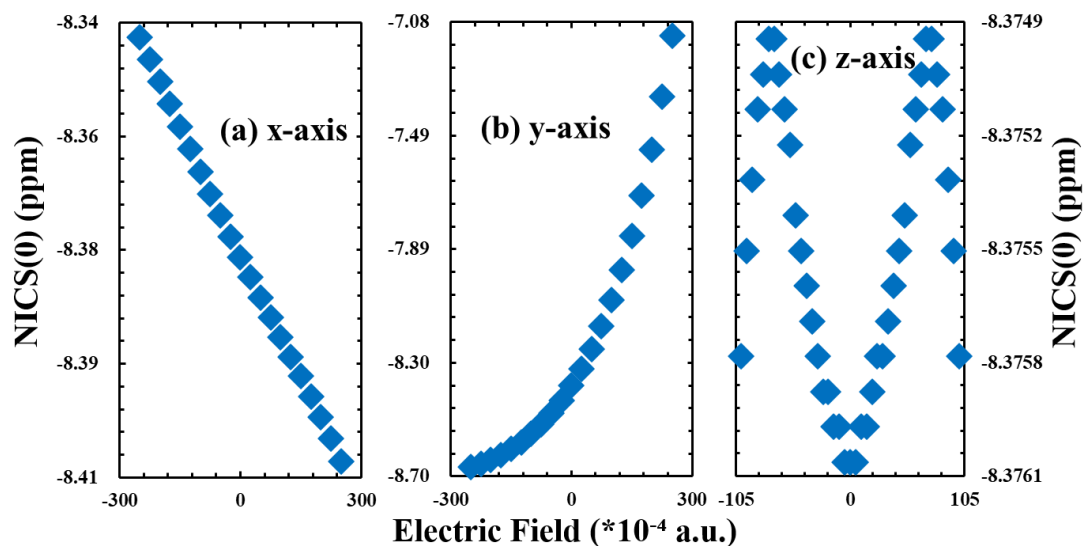

**Figure S10** NICS(0) values of calculated benzoic acid under the electric field at M062X/6-311G(d,p) level.

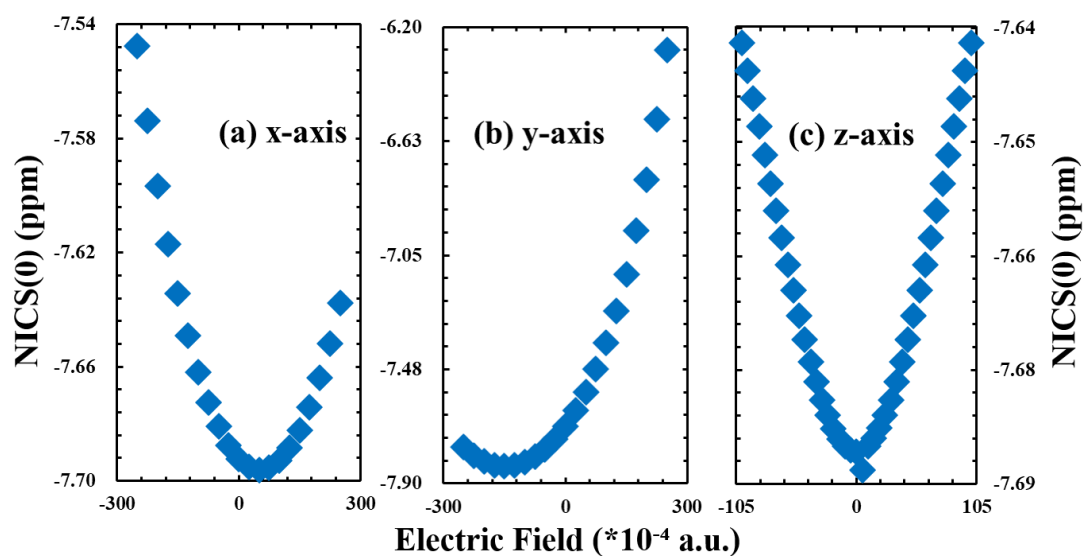

**Figure S11** NICS(0) values of calculated benzoic acid under the electric field at M062X/6-311+G(d,p) level.

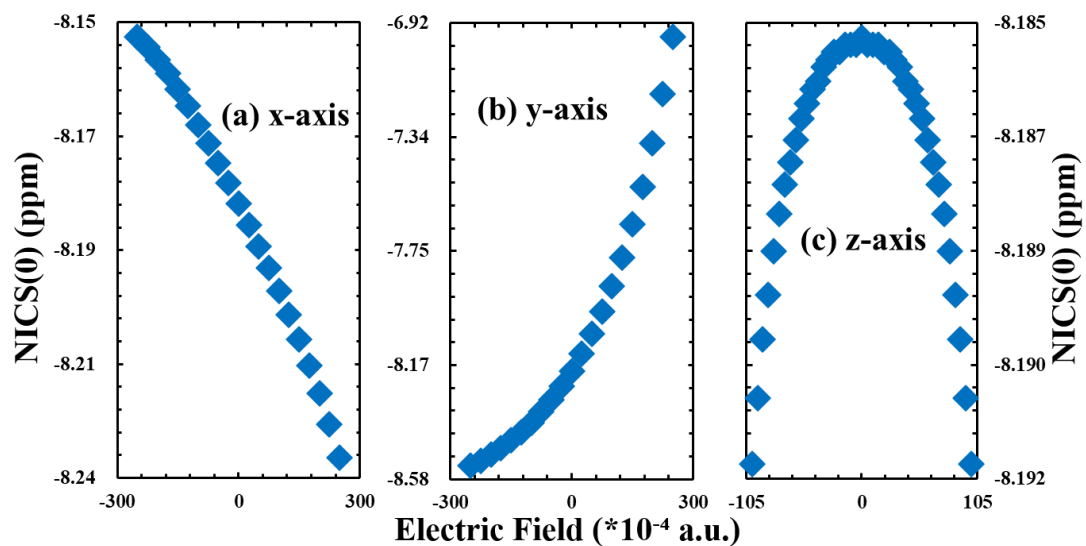

**Figure S12** NICS(0) values of calculated benzoic acid under the electric field at M062X/Def2SVPP level.

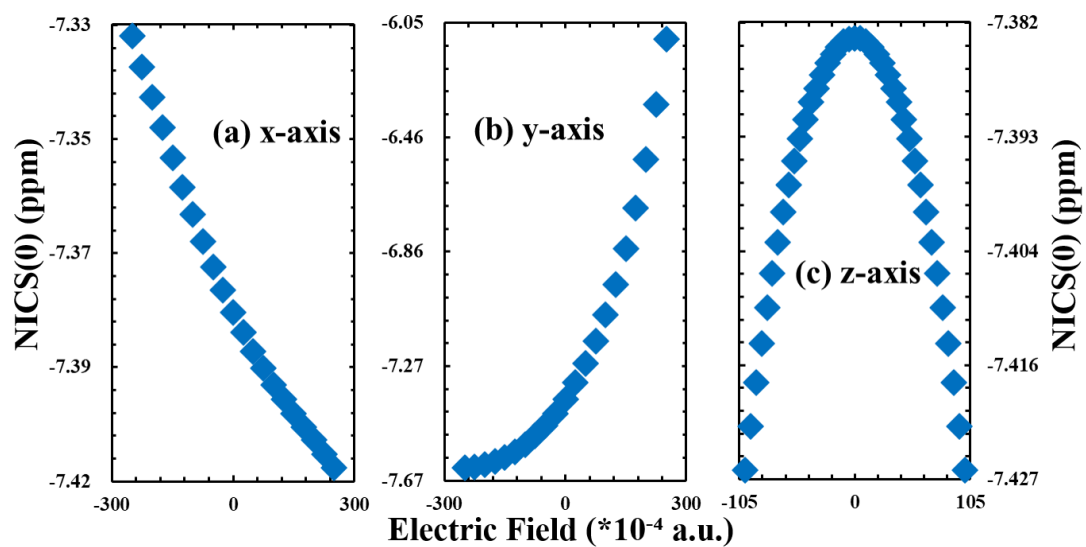

**Figure S13** NICS(0) values of calculated benzoic acid under the electric field at M062X/Def2TZVP level.



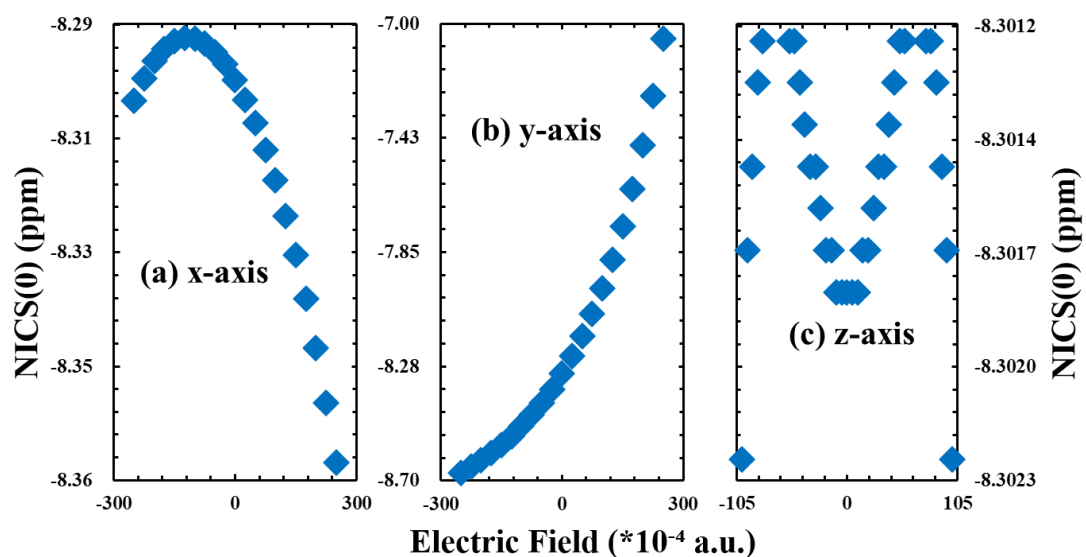

**Figure S14** NICS(0) values of calculated benzoic acid under the electric field at M062X/cc-pVDZ level.

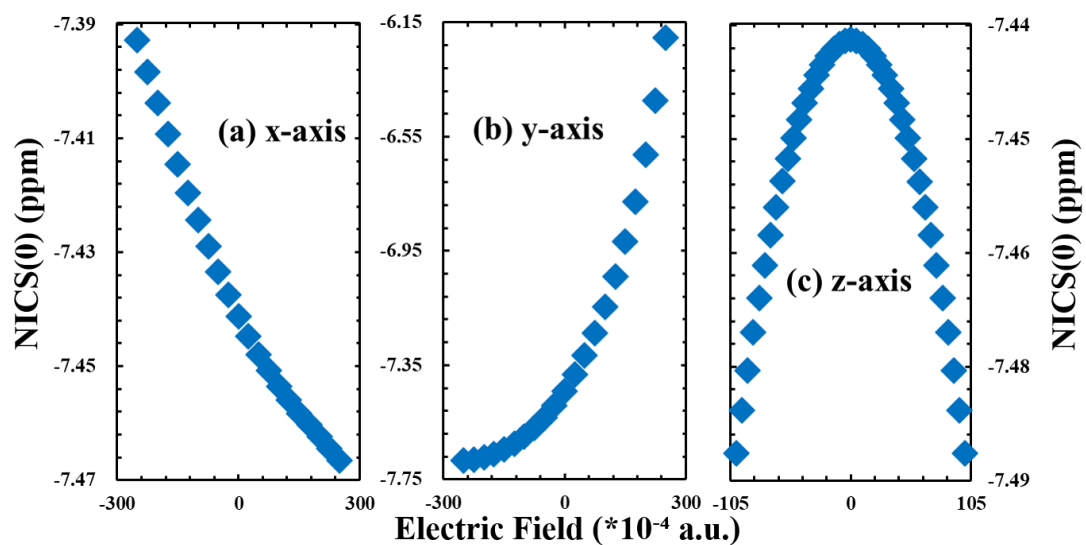

**Figure S15** NICS(0) values of calculated benzoic acid under the electric field at M062X/cc-pVTZ level.

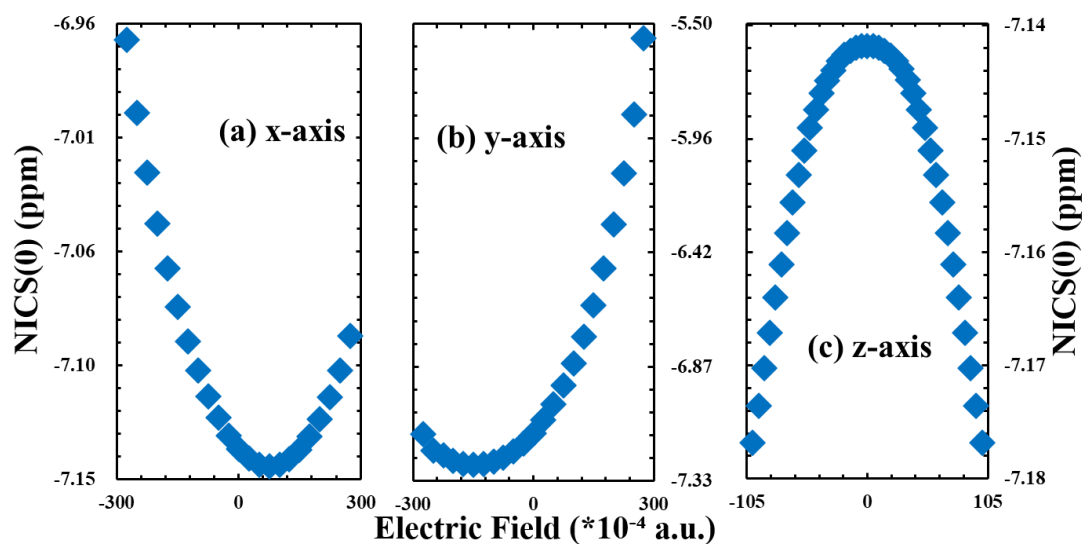

**Figure S16** NICS(0) values of calculated benzoic acid under the electric field at M062X/aug-cc-pVTZ level.

**2. Profiles of average C-C bond distance of the ring change as a function of the strength of the applied external electric field.**

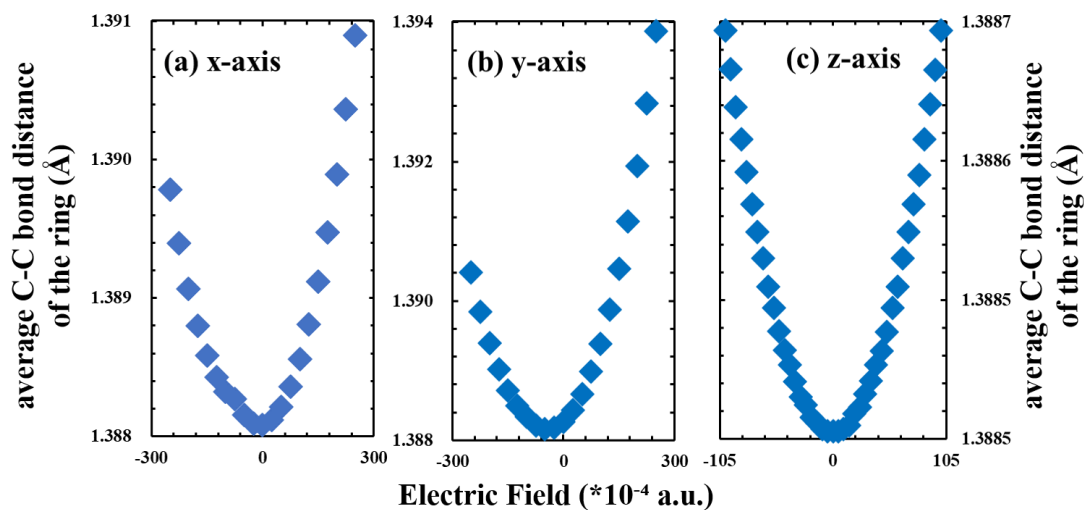

**Figure S17** Profiles of average C-C bond distance of the ring change as a function of the strength of the applied external electric field along (a) x-axis; (b) y-axis; and (c) z-axis.

3. Aromaticity results characterized by other indicators (such as NICS(1)<sub>zz</sub>, PDI, HOMA, FLU) of benzoic acid under the external electric field.

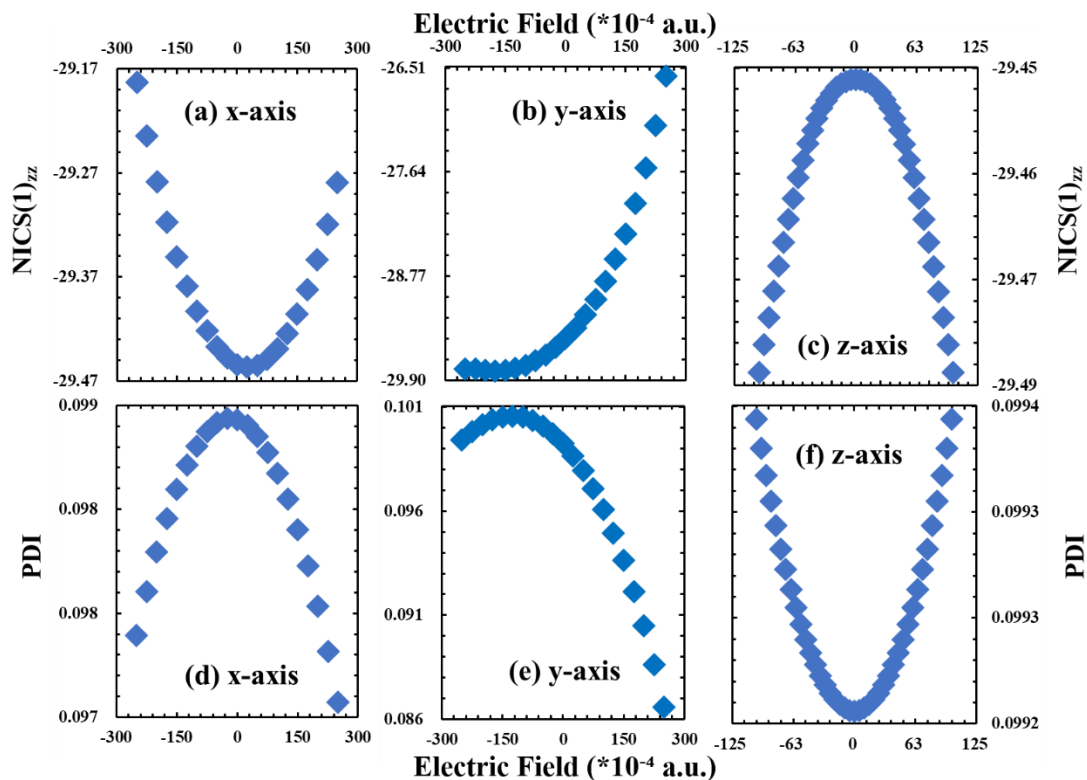

**Figure S18** Changes in NICS(1)<sub>zz</sub> and PDI values of benzoic acid with electric field changes, shown here are changes in all three directions: (a) (d) x-axis; (b) (e) y-axis; (c) (f) z-axis.

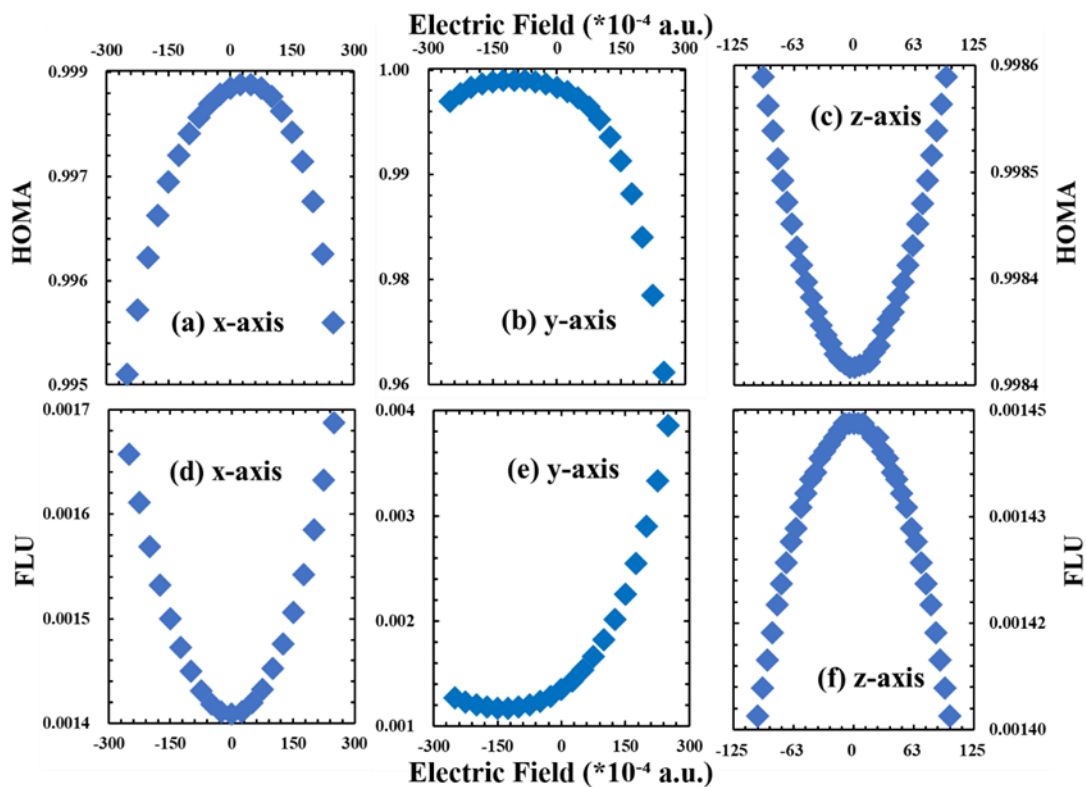

**Figure S19** Changes in HOMA and FLU values of benzoic acid with electric field changes, shown here are changes in all three directions: (a) (d) x-axis; (b) (e) y-axis; (c) (f) z-axis.

4. Profiles of the molecular electrostatic potential (MEP) values and natural valence atomic orbital energy (NAO) values of the dissociating proton on benzoic acid as a function of the applied external electric field strength for p-fluorobenzoic acid and 3,5-difluorobenzoic acid in three directions.

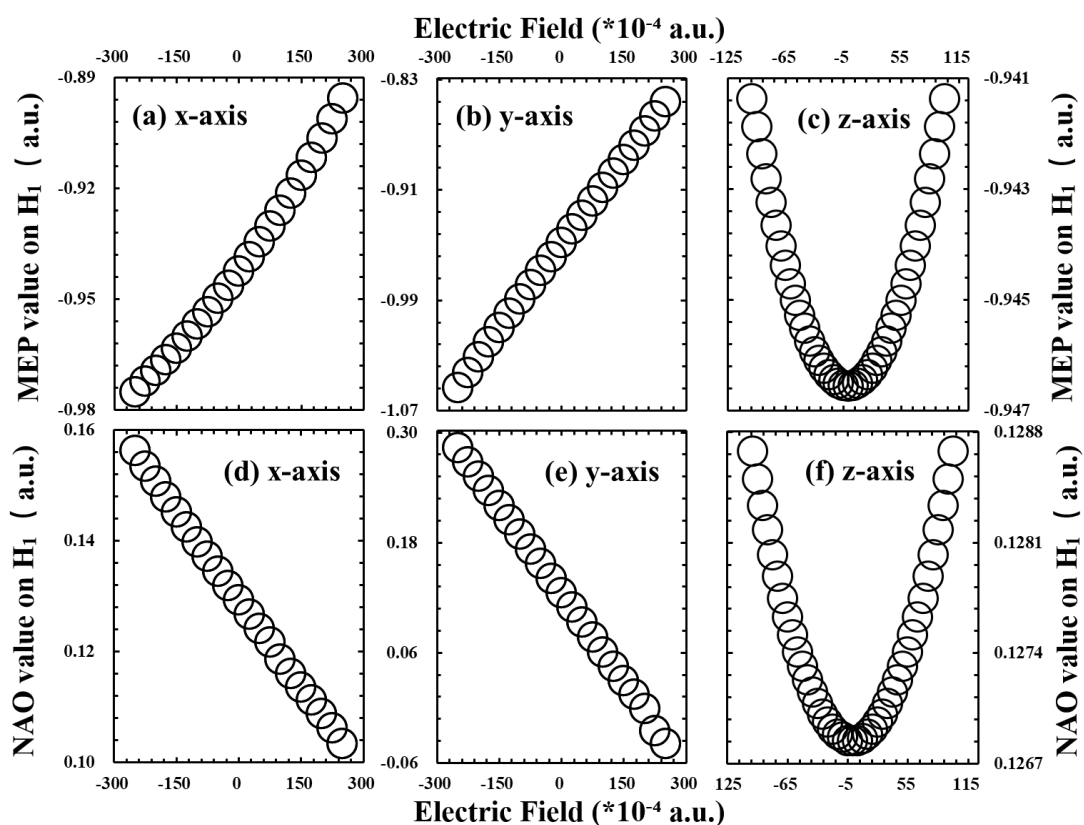

**Figure S20** Profiles of the molecular electrostatic potential (MEP) values and natural valence atomic orbital energy (NAO) values of the dissociating proton on benzoic acid ( $H_1$  in Scheme 1) as a function of p-fluorobenzoic acid applied external electric field strength in three directions.

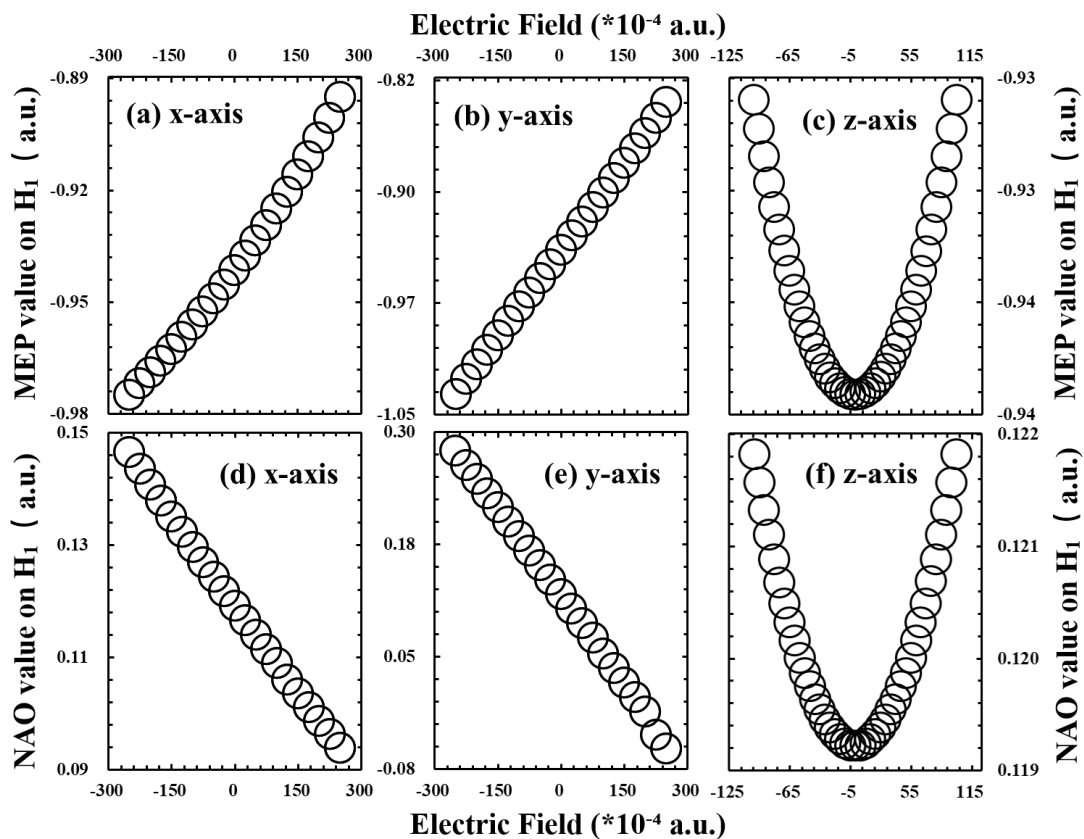

**Figure S21** Profiles of the molecular electrostatic potential (MEP) values and natural valence atomic orbital energy (NAO) values of the dissociating proton on benzoic acid (H<sub>1</sub> in Scheme 1) as a function of 3,5-difluorobenzoic acid applied external electric field strength in three directions.

5. Predicted pKa values as a function of p-fluorobenzoic acid and 3,5-difluorobenzoic applied external electric field strength in three directions.

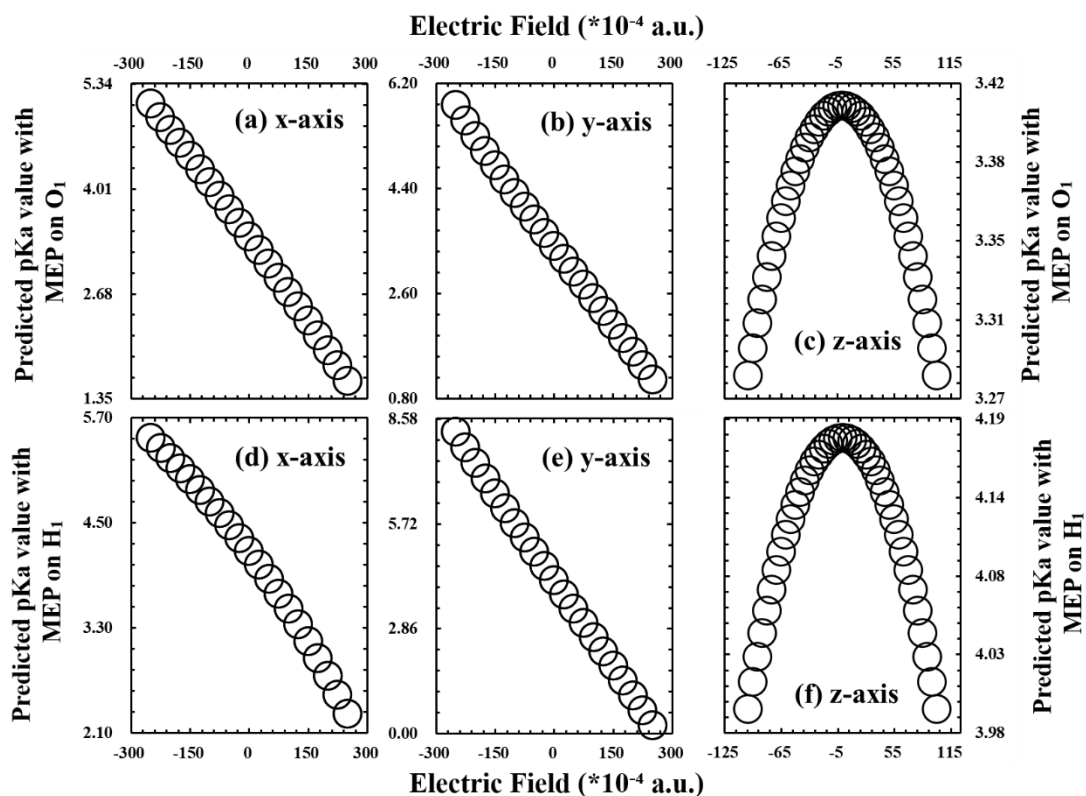

**Figure S22** Predicted pKa values as a function of p-fluorobenzoic acid applied external electric field strength in three different directions. (a) - (c) are predicted pKa values using MEP results from O<sub>1</sub> in Scheme 1 and (d) - (f) are values using MEP data from H<sub>1</sub>.

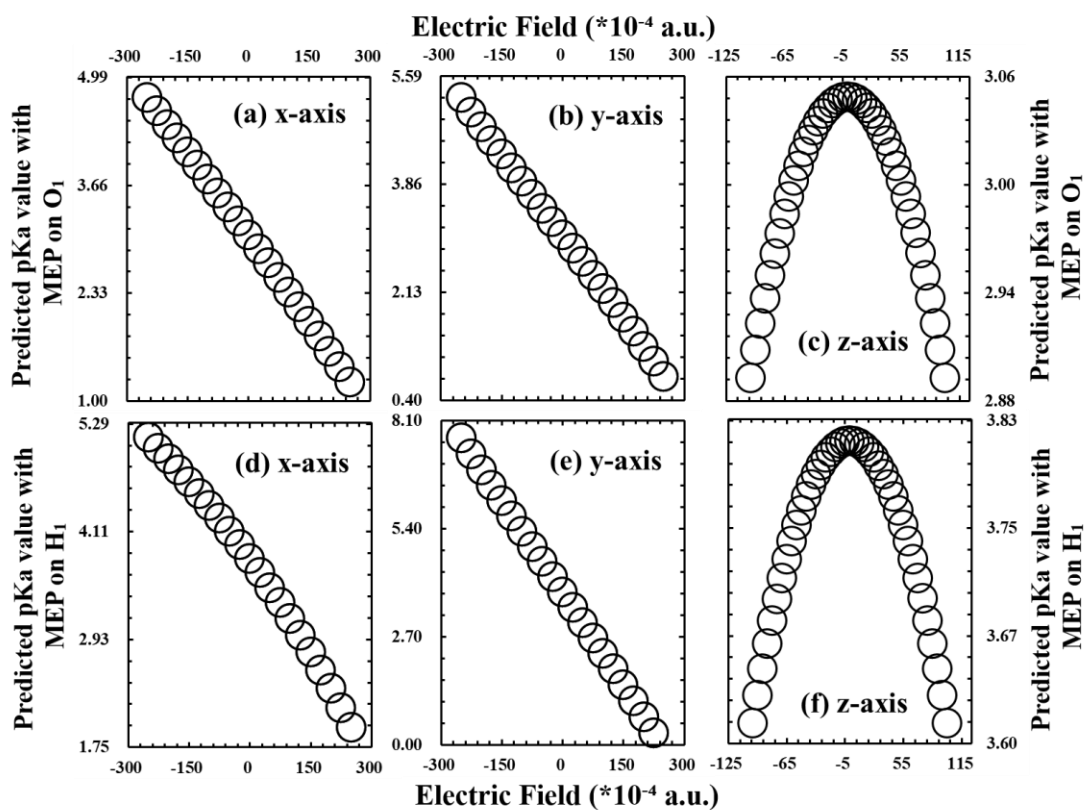

**Figure S23** Predicted pKa values as a function of 3,5-difluorobenzoic applied external electric field strength in three different directions. (a) - (c) are predicted pKa values using MEP results from  $O_1$  in Scheme 1 and (d) - (f) are values using MEP data from  $H_1$ .



6. Strong linear correlations of MEP values of p-fluorobenzoic acid and 3,5-difluorobenzoic with NPA partial charges on both O<sub>1</sub> and H<sub>1</sub> for when the external electric field is applied to any of the three directions.

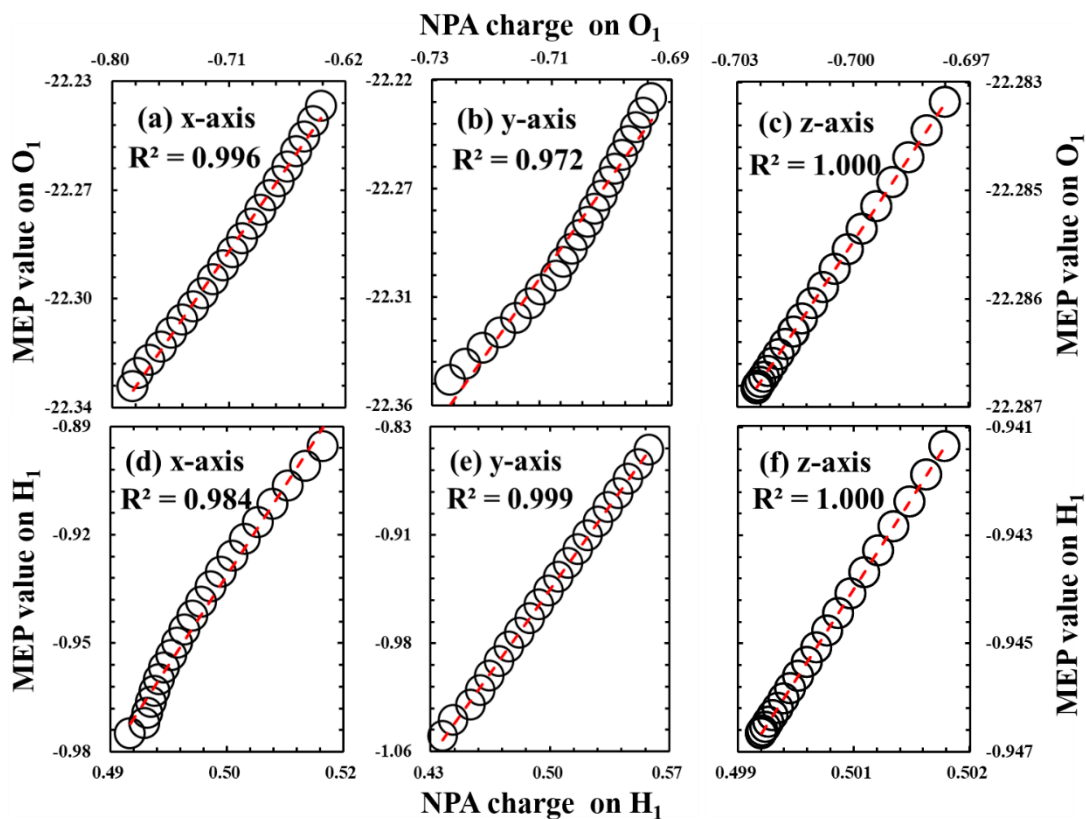

**Figure S24** Strong linear correlations of MEP values of p-fluorobenzoic acid with NPA partial charges on both O<sub>1</sub> and H<sub>1</sub> for when the external electric field is applied to any of the three directions. (a) - (c) are for O<sub>1</sub> in Scheme 1 and (d) - (f) are for H<sub>1</sub> in Scheme 1.

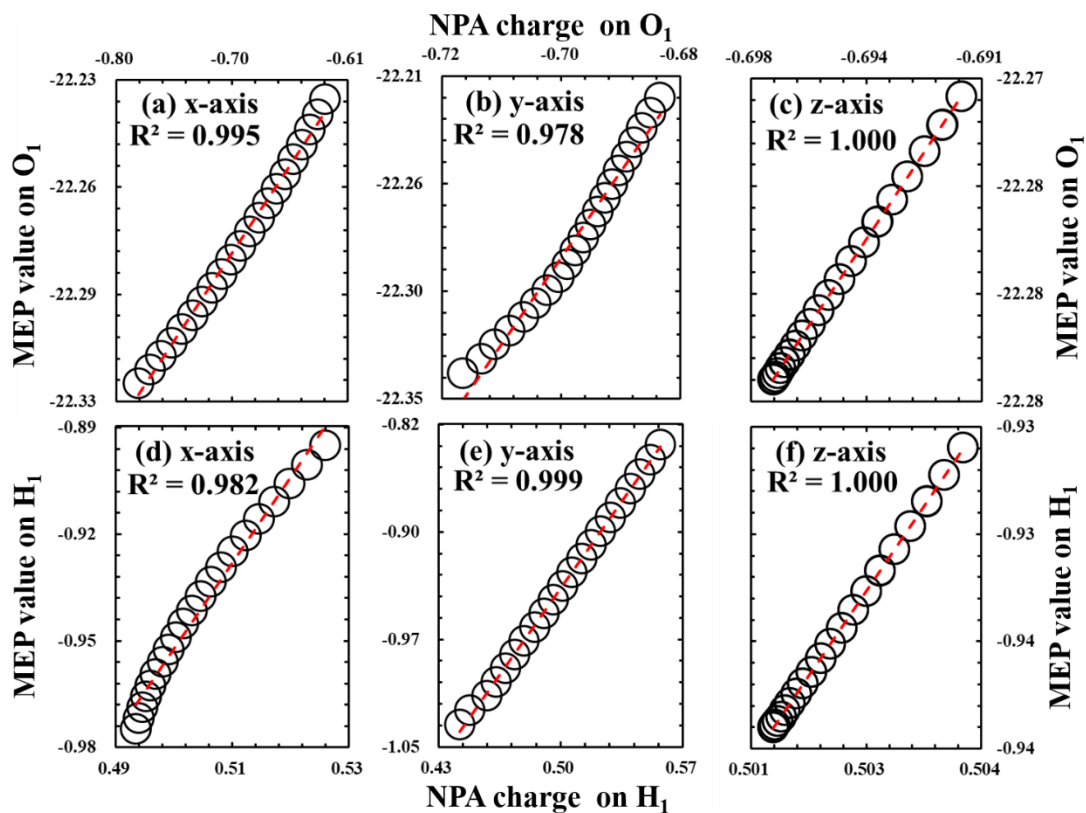

**Figure S25** Strong linear correlations of MEP values of 3,5-difluorobenzoic with NPA partial charges on both O<sub>1</sub> and H<sub>1</sub> for when the external electric field is applied to any of the three directions. (a) - (c) are for O<sub>1</sub> in Scheme 1 and (d) - (f) are for H<sub>1</sub> in Scheme 1.

## 7. The optimized molecular coordinates

==> 1\_H\_x+00.gjf <==

|   |             |             |             |
|---|-------------|-------------|-------------|
| C | 1.23575700  | 0.69015800  | -0.00000100 |
| C | 0.04075400  | 1.40227300  | -0.00000600 |
| C | -1.17756700 | 0.73058100  | -0.00000700 |
| C | -1.20059800 | -0.65365900 | -0.00000300 |
| C | -0.00776300 | -1.36629700 | 0.00000100  |
| C | 1.20790200  | -0.69590500 | 0.00000300  |
| H | 2.17567300  | 1.22236900  | 0.00000100  |
| H | -2.09022400 | 1.31000800  | -0.00001000 |
| H | -2.14569300 | -1.17847800 | -0.00000400 |
| H | -0.02623100 | -2.44775500 | 0.00000400  |
| H | 2.13408000  | -1.25348400 | 0.00000600  |
| C | 0.01470400  | 2.88752700  | -0.00000800 |
| O | -0.98381200 | 3.55582800  | -0.00000600 |
| O | 1.24428300  | 3.43827400  | -0.00001300 |
| H | 1.11980700  | 4.39627300  | -0.00001500 |

==> 1\_H\_x-100.gjf <==

|   |             |             |             |
|---|-------------|-------------|-------------|
| C | 1.23236500  | 0.69425800  | -0.00000100 |
| C | 0.03596300  | 1.40448300  | -0.00000400 |
| C | -1.18111500 | 0.72988900  | -0.00000600 |
| C | -1.20118500 | -0.65370100 | -0.00000400 |
| C | -0.00590800 | -1.36530500 | 0.00000000  |
| C | 1.20779100  | -0.69344100 | 0.00000200  |
| H | 2.17447200  | 1.22308900  | 0.00000100  |
| H | -2.09244500 | 1.31229700  | -0.00000900 |
| H | -2.14565300 | -1.18269800 | -0.00000500 |
| H | -0.01816400 | -2.44693700 | 0.00000200  |
| H | 2.13638400  | -1.24645200 | 0.00000500  |
| C | 0.01015000  | 2.89222300  | -0.00000600 |
| O | -1.00044000 | 3.55510400  | 0.00000100  |
| O | 1.23102900  | 3.42575000  | -0.00001700 |
| H | 1.15782700  | 4.38915500  | -0.00001700 |

==> 1\_H\_x+100.gjf <==

|   |             |             |             |
|---|-------------|-------------|-------------|
| C | 1.23907700  | 0.68710500  | -0.00000600 |
| C | 0.04415300  | 1.40038300  | -0.00000500 |
| C | -1.17597400 | 0.73104600  | -0.00000200 |
| C | -1.20101000 | -0.65478300 | 0.00000100  |
| C | -0.00931400 | -1.36761900 | 0.00000000  |
| C | 1.20876300  | -0.69812900 | -0.00000300 |
| H | 2.17760000  | 1.22313700  | -0.00000800 |

|   |             |             |             |
|---|-------------|-------------|-------------|
| H | -2.09163900 | 1.30660300  | -0.00000200 |
| H | -2.14772000 | -1.17615700 | 0.00000400  |
| H | -0.03329400 | -2.44902300 | 0.00000200  |
| H | 2.13422900  | -1.25963300 | -0.00000500 |
| C | 0.01815400  | 2.88361100  | -0.00000900 |
| O | -0.96811600 | 3.55827900  | -0.00001400 |
| O | 1.25869100  | 3.45093100  | -0.00000500 |
| H | 1.08747100  | 4.40196200  | -0.00000700 |

==> 1\_H\_x-125.gjf <==

|   |             |             |             |
|---|-------------|-------------|-------------|
| C | 1.23149900  | 0.69545200  | -0.00000400 |
| C | 0.03453300  | 1.40509800  | -0.00000600 |
| C | -1.18230700 | 0.72968200  | -0.00000500 |
| C | -1.20147700 | -0.65389900 | -0.00000200 |
| C | -0.00539300 | -1.36510800 | 0.00000100  |
| C | 1.20788900  | -0.69277500 | 0.00000000  |
| H | 2.17427500  | 1.22351500  | -0.00000500 |
| H | -2.09358400 | 1.31267600  | -0.00000700 |
| H | -2.14595600 | -1.18405100 | 0.00000000  |
| H | -0.01597100 | -2.44680100 | 0.00000400  |
| H | 2.13734300  | -1.24454800 | 0.00000200  |
| C | 0.00883200  | 2.89354300  | -0.00000800 |
| O | -1.00478900 | 3.55519200  | -0.00001100 |
| O | 1.22783000  | 3.42263900  | -0.00000700 |
| H | 1.16834900  | 4.38709800  | -0.00000900 |

==> 1\_H\_x+125.gjf <==

|   |             |             |             |
|---|-------------|-------------|-------------|
| C | 1.23988600  | 0.68649500  | -0.00000300 |
| C | 0.04478700  | 1.39995600  | -0.00000100 |
| C | -1.17590100 | 0.73110800  | 0.00000000  |
| C | -1.20127700 | -0.65525600 | -0.00000100 |
| C | -0.00965100 | -1.36800700 | -0.00000200 |
| C | 1.20909500  | -0.69865700 | -0.00000400 |
| H | 2.17816900  | 1.22358700  | -0.00000600 |
| H | -2.09255900 | 1.30559100  | 0.00000000  |
| H | -2.14853200 | -1.17589400 | -0.00000100 |
| H | -0.03491200 | -2.44941700 | -0.00000200 |
| H | 2.13465900  | -1.26103700 | -0.00000500 |
| C | 0.01883500  | 2.88274100  | -0.00000300 |
| O | -0.96431100 | 3.55917500  | 0.00001200  |
| O | 1.26253300  | 3.45411400  | -0.00002200 |
| H | 1.08025200  | 4.40321300  | -0.00002100 |

==> 1\_H\_x-150.gjf <==

|   |             |             |             |
|---|-------------|-------------|-------------|
| C | 1.23062400  | 0.69671800  | -0.00000700 |
| C | 0.03300200  | 1.40574000  | -0.00000800 |
| C | -1.18362200 | 0.72946400  | -0.00000400 |
| C | -1.20182400 | -0.65417700 | 0.00000100  |
| C | -0.00485700 | -1.36493100 | 0.00000200  |
| C | 1.20804000  | -0.69208400 | -0.00000200 |
| H | 2.17411600  | 1.22404400  | -0.00001000 |
| H | -2.09496900 | 1.31296800  | -0.00000400 |
| H | -2.14638800 | -1.18552500 | 0.00000500  |
| H | -0.01370000 | -2.44669100 | 0.00000500  |
| H | 2.13845600  | -1.24258400 | -0.00000200 |
| C | 0.00744400  | 2.89492800  | -0.00001200 |
| O | -1.00922500 | 3.55538900  | -0.00002900 |
| O | 1.22466300  | 3.41953900  | 0.00000600  |
| H | 1.17931200  | 4.38491400  | 0.00000100  |

==> 1\_H\_x+150.gjf <==

|   |             |             |             |
|---|-------------|-------------|-------------|
| C | 1.24067100  | 0.68600500  | -0.00000900 |
| C | 0.04528100  | 1.39954000  | -0.00000300 |
| C | -1.17598400 | 0.73115800  | 0.00000300  |
| C | -1.20162900 | -0.65581100 | 0.00000400  |
| C | -0.00996400 | -1.36840900 | -0.00000200 |
| C | 1.20944900  | -0.69913400 | -0.00000900 |
| H | 2.17879200  | 1.22412600  | -0.00001600 |
| H | -2.09378200 | 1.30445000  | 0.00000800  |
| H | -2.14947400 | -1.17579000 | 0.00001000  |
| H | -0.03642900 | -2.44983500 | -0.00000200 |
| H | 2.13526500  | -1.26230700 | -0.00001500 |
| C | 0.01940500  | 2.88190400  | -0.00000500 |
| O | -0.96051900 | 3.56023200  | -0.00000400 |
| O | 1.26653300  | 3.45723800  | -0.00000800 |
| H | 1.07345700  | 4.40434500  | -0.00000900 |

==> 1\_H\_x-175.gjf <==

|   |             |             |             |
|---|-------------|-------------|-------------|
| C | 1.22973900  | 0.69805200  | -0.00000600 |
| C | 0.03137600  | 1.40641300  | -0.00000700 |
| C | -1.18505800 | 0.72923200  | -0.00000400 |
| C | -1.20222400 | -0.65453200 | 0.00000100  |
| C | -0.00430000 | -1.36477700 | 0.00000200  |
| C | 1.20824500  | -0.69137200 | -0.00000200 |
| H | 2.17399800  | 1.22467200  | -0.00000900 |
| H | -2.09659600 | 1.31317400  | -0.00000400 |
| H | -2.14695100 | -1.18711800 | 0.00000400  |
| H | -0.01135400 | -2.44660900 | 0.00000500  |

|   |             |             |             |
|---|-------------|-------------|-------------|
| H | 2.13972700  | -1.24055800 | -0.00000100 |
| C | 0.00598000  | 2.89638400  | -0.00001100 |
| O | -1.01375700 | 3.55569600  | -0.00002400 |
| O | 1.22151800  | 3.41645900  | 0.00000100  |
| H | 1.19073000  | 4.38259700  | -0.00000100 |

==> 1\_H\_x+175.gjf <==

|   |             |             |             |
|---|-------------|-------------|-------------|
| C | 1.24143500  | 0.68557400  | -0.00001500 |
| C | 0.04568100  | 1.39914300  | -0.00000300 |
| C | -1.17621300 | 0.73117400  | 0.00000900  |
| C | -1.20204800 | -0.65645400 | 0.00001200  |
| C | -0.01025300 | -1.36883800 | -0.00000200 |
| C | 1.20985100  | -0.69960000 | -0.00001700 |
| H | 2.17942800  | 1.22479000  | -0.00002700 |
| H | -2.09524200 | 1.30324200  | 0.00001700  |
| H | -2.15053900 | -1.17582900 | 0.00002200  |
| H | -0.03788500 | -2.45028800 | -0.00000200 |
| H | 2.13603800  | -1.26351800 | -0.00003000 |
| C | 0.01989000  | 2.88110800  | -0.00000900 |
| O | -0.95676700 | 3.56141600  | -0.00002900 |
| O | 1.27066200  | 3.46036800  | 0.00001000  |
| H | 1.06703500  | 4.40542600  | 0.00000600  |

==> 1\_H\_x-200.gjf <==

|   |             |             |             |
|---|-------------|-------------|-------------|
| C | 1.22884900  | 0.69945500  | -0.00000500 |
| C | 0.02965400  | 1.40711700  | -0.00000600 |
| C | -1.18661300 | 0.72899000  | -0.00000400 |
| C | -1.20267600 | -0.65496500 | 0.00000000  |
| C | -0.00372200 | -1.36464700 | 0.00000100  |
| C | 1.20850500  | -0.69063900 | -0.00000100 |
| H | 2.17392400  | 1.22540000  | -0.00000700 |
| H | -2.09846900 | 1.31329300  | -0.00000500 |
| H | -2.14765100 | -1.18882600 | 0.00000200  |
| H | -0.00893100 | -2.44655700 | 0.00000400  |
| H | 2.14115500  | -1.23847700 | 0.00000000  |
| C | 0.00444800  | 2.89791200  | -0.00001000 |
| O | -1.01838500 | 3.55610800  | -0.00002000 |
| O | 1.21839100  | 3.41340900  | -0.00000200 |
| H | 1.20259300  | 4.38014100  | -0.00000400 |

==> 1\_H\_x+200.gjf <==

|   |             |            |             |
|---|-------------|------------|-------------|
| C | 1.24217500  | 0.68522400 | -0.00001300 |
| C | 0.04597400  | 1.39876000 | 0.00000100  |
| C | -1.17660800 | 0.73115900 | 0.00001100  |

|   |             |             |             |
|---|-------------|-------------|-------------|
| C | -1.20254600 | -0.65718000 | 0.00001000  |
| C | -0.01051300 | -1.36929100 | -0.00000500 |
| C | 1.21029400  | -0.70004800 | -0.00001700 |
| H | 2.18007600  | 1.22559700  | -0.00002400 |
| H | -2.09696600 | 1.30196400  | 0.00002000  |
| H | -2.15172300 | -1.17603600 | 0.00001800  |
| H | -0.03928100 | -2.45077400 | -0.00000800 |
| H | 2.13698900  | -1.26465000 | -0.00003100 |
| C | 0.02028000  | 2.88033400  | -0.00000100 |
| O | -0.95303600 | 3.56272400  | 0.00001000  |
| O | 1.27495600  | 3.46349100  | -0.00001500 |
| H | 1.06100100  | 4.40644000  | -0.00001300 |

==> 1\_H\_x-225.gjf <==

|   |             |             |             |
|---|-------------|-------------|-------------|
| C | 1.22795400  | 0.70092300  | 0.00000100  |
| C | 0.02783900  | 1.40785400  | -0.00000500 |
| C | -1.18828300 | 0.72874000  | -0.00000600 |
| C | -1.20317700 | -0.65547600 | -0.00000300 |
| C | -0.00312400 | -1.36454300 | 0.00000200  |
| C | 1.20882300  | -0.68988800 | 0.00000400  |
| H | 2.17390000  | 1.22622200  | 0.00000100  |
| H | -2.10058900 | 1.31332200  | -0.00001100 |
| H | -2.14849300 | -1.19064400 | -0.00000500 |
| H | -0.00643000 | -2.44653600 | 0.00000500  |
| H | 2.14274100  | -1.23634700 | 0.00000800  |
| C | 0.00285100  | 2.89951700  | -0.00001000 |
| O | -1.02311100 | 3.55662700  | -0.00001600 |
| O | 1.21527900  | 3.41040200  | -0.00001000 |
| H | 1.21489300  | 4.37754100  | -0.00001300 |

==> 1\_H\_x+225.gjf <==

|   |             |             |             |
|---|-------------|-------------|-------------|
| C | 1.24288800  | 0.68496700  | -0.00002100 |
| C | 0.04612700  | 1.39839000  | -0.00000200 |
| C | -1.17715400 | 0.73111300  | 0.00001600  |
| C | -1.20312600 | -0.65801200 | 0.00001400  |
| C | -0.01075800 | -1.36977100 | -0.00000600 |
| C | 1.21076000  | -0.70045300 | -0.00002300 |
| H | 2.18076600  | 1.22647900  | -0.00003700 |
| H | -2.09898600 | 1.30054500  | 0.00003100  |
| H | -2.15304900 | -1.17639800 | 0.00002500  |
| H | -0.04056700 | -2.45129600 | -0.00000800 |
| H | 2.13812200  | -1.26565800 | -0.00003900 |
| C | 0.02055300  | 2.87961700  | 0.00000000  |
| O | -0.94931400 | 3.56423400  | 0.00000400  |

|   |            |            |             |
|---|------------|------------|-------------|
| O | 1.27943100 | 3.46658200 | -0.00000300 |
| H | 1.05537700 | 4.40737400 | -0.00001000 |

==> 1\_H\_x-250.gjf <==

|   |             |             |             |
|---|-------------|-------------|-------------|
| C | 1.22705800  | 0.70245800  | 0.00000200  |
| C | 0.02592900  | 1.40862300  | -0.00000300 |
| C | -1.19006900 | 0.72848500  | -0.00000600 |
| C | -1.20372600 | -0.65606700 | -0.00000300 |
| C | -0.00250700 | -1.36446500 | 0.00000200  |
| C | 1.20920000  | -0.68911600 | 0.00000500  |
| H | 2.17392800  | 1.22714000  | 0.00000400  |
| H | -2.10296400 | 1.31325600  | -0.00001200 |
| H | -2.14948500 | -1.19257100 | -0.00000700 |
| H | -0.00384800 | -2.44654600 | 0.00000400  |
| H | 2.14448700  | -1.23417000 | 0.00000900  |
| C | 0.00119400  | 2.90120000  | -0.00001000 |
| O | -1.02793600 | 3.55725300  | -0.00001600 |
| O | 1.21217600  | 3.40744600  | -0.00001100 |
| H | 1.22763500  | 4.37478600  | -0.00001500 |

==> 1\_H\_x+250.gjf <==

|   |             |             |             |
|---|-------------|-------------|-------------|
| C | 1.24356300  | 0.68479800  | -0.00001800 |
| C | 0.04615700  | 1.39803300  | 0.00000400  |
| C | -1.17788500 | 0.73102800  | 0.00001800  |
| C | -1.20378900 | -0.65893900 | 0.00001100  |
| C | -0.01097100 | -1.37027900 | -0.00000800 |
| C | 1.21126400  | -0.70083400 | -0.00002300 |
| H | 2.18145400  | 1.22751700  | -0.00003200 |
| H | -2.10129700 | 1.29903800  | 0.00003400  |
| H | -2.15449800 | -1.17694900 | 0.00002000  |
| H | -0.04178700 | -2.45185600 | -0.00001400 |
| H | 2.13944800  | -1.26656700 | -0.00004100 |
| C | 0.02071700  | 2.87891700  | 0.00001100  |
| O | -0.94559500 | 3.56589400  | 0.00005100  |
| O | 1.28412200  | 3.46966700  | -0.00003500 |
| H | 1.05016600  | 4.40824600  | -0.00003500 |

==> 1\_H\_x-25.gjf <==

|   |             |             |             |
|---|-------------|-------------|-------------|
| C | 1.23491500  | 0.69108500  | -0.00000100 |
| C | 0.03968700  | 1.40279200  | -0.00000600 |
| C | -1.17827400 | 0.73042700  | -0.00000600 |
| C | -1.20065500 | -0.65356000 | -0.00000300 |
| C | -0.00732800 | -1.36601800 | 0.00000100  |
| C | 1.20780100  | -0.69531300 | 0.00000300  |



|   |             |             |             |
|---|-------------|-------------|-------------|
| H | 2.17530500  | 1.22240900  | 0.00000100  |
| H | -2.09043900 | 1.31068700  | -0.00001000 |
| H | -2.14549600 | -1.17935800 | -0.00000400 |
| H | -0.02431100 | -2.44751000 | 0.00000400  |
| H | 2.13442800  | -1.25180700 | 0.00000600  |
| C | 0.01366800  | 2.88862100  | -0.00000800 |
| O | -0.98786800 | 3.55548800  | -0.00000700 |
| O | 1.24088300  | 3.43512600  | -0.00001200 |
| H | 1.12875500  | 4.39464300  | -0.00001500 |

==> 1\_H\_x+25.gjf <==

|   |             |             |             |
|---|-------------|-------------|-------------|
| C | 1.23659500  | 0.68929500  | 0.00000100  |
| C | 0.04173500  | 1.40177400  | -0.00000400 |
| C | -1.17698000 | 0.73072100  | -0.00000700 |
| C | -1.20060300 | -0.65382900 | -0.00000600 |
| C | -0.00817900 | -1.36659600 | 0.00000000  |
| C | 1.20805000  | -0.69648300 | 0.00000500  |
| H | 2.17608800  | 1.22241900  | 0.00000400  |
| H | -2.09023600 | 1.30925900  | -0.00001100 |
| H | -2.14601400 | -1.17771400 | -0.00000900 |
| H | -0.02809000 | -2.44803000 | 0.00000200  |
| H | 2.13388600  | -1.25510500 | 0.00001000  |
| C | 0.01567300  | 2.88648200  | -0.00000500 |
| O | -0.97981400 | 3.55627400  | 0.00001000  |
| O | 1.24775400  | 3.44143000  | -0.00002500 |
| H | 1.11120800  | 4.39781600  | -0.00002300 |

==> 1\_H\_x-50.gjf <==

|   |             |             |             |
|---|-------------|-------------|-------------|
| C | 1.23407000  | 0.69207600  | 0.00000300  |
| C | 0.03853600  | 1.40333300  | -0.00000300 |
| C | -1.17910100 | 0.73026000  | -0.00000700 |
| C | -1.20077300 | -0.65353300 | -0.00000700 |
| C | -0.00687400 | -1.36576100 | 0.00000000  |
| C | 1.20774800  | -0.69470800 | 0.00000600  |
| H | 2.17498300  | 1.22253900  | 0.00000700  |
| H | -2.09087700 | 1.31129600  | -0.00001200 |
| H | -2.14542400 | -1.18035400 | -0.00001200 |
| H | -0.02233000 | -2.44729200 | 0.00000100  |
| H | 2.13492900  | -1.25007600 | 0.00001100  |
| C | 0.01256400  | 2.88976700  | -0.00000300 |
| O | -0.99198700 | 3.55525400  | 0.00001900  |
| O | 1.23754700  | 3.43199200  | -0.00003200 |
| H | 1.13806100  | 4.39291800  | -0.00002800 |

==> 1\_H\_x+50.gjf <==

|   |             |             |             |
|---|-------------|-------------|-------------|
| C | 1.23743000  | 0.68849800  | -0.00000200 |
| C | 0.04263000  | 1.40129300  | -0.00000500 |
| C | -1.17651700 | 0.73084700  | -0.00000500 |
| C | -1.20067200 | -0.65407300 | -0.00000200 |
| C | -0.00857700 | -1.36691600 | 0.00000100  |
| C | 1.20824400  | -0.69704700 | 0.00000100  |
| H | 2.17654900  | 1.22256300  | -0.00000200 |
| H | -2.09047200 | 1.30844400  | -0.00000800 |
| H | -2.14645900 | -1.17707100 | -0.00000100 |
| H | -0.02988700 | -2.44833100 | 0.00000400  |
| H | 2.13384300  | -1.25667500 | 0.00000300  |
| C | 0.01657300  | 2.88548200  | -0.00000900 |
| O | -0.97586900 | 3.55682900  | -0.00001100 |
| O | 1.25130600  | 3.44459500  | -0.00000900 |
| H | 1.10295000  | 4.39927500  | -0.00001200 |

==> 1\_H\_x-75.gjf <==

|   |             |             |             |
|---|-------------|-------------|-------------|
| C | 1.23322200  | 0.69313300  | 0.00000000  |
| C | 0.03729600  | 1.40389600  | -0.00000500 |
| C | -1.18004700 | 0.73008100  | -0.00000600 |
| C | -1.20095000 | -0.65357900 | -0.00000400 |
| C | -0.00640100 | -1.36552300 | 0.00000100  |
| C | 1.20774400  | -0.69408400 | 0.00000200  |
| H | 2.17470700  | 1.22276500  | 0.00000100  |
| H | -2.09154400 | 1.31183500  | -0.00000900 |
| H | -2.14547600 | -1.18146700 | -0.00000500 |
| H | -0.02028200 | -2.44710100 | 0.00000300  |
| H | 2.13558000  | -1.24829400 | 0.00000600  |
| C | 0.01139300  | 2.89096600  | -0.00000700 |
| O | -0.99617500 | 3.55512500  | -0.00000100 |
| O | 1.23426500  | 3.42886700  | -0.00001600 |
| H | 1.14774000  | 4.39109200  | -0.00001700 |

==> 1\_H\_x+75.gjf <==

|   |             |             |             |
|---|-------------|-------------|-------------|
| C | 1.23825800  | 0.68776600  | -0.00000500 |
| C | 0.04343700  | 1.40083000  | -0.00000600 |
| C | -1.17618000 | 0.73095600  | -0.00000400 |
| C | -1.20080700 | -0.65439000 | 0.00000000  |
| C | -0.00895600 | -1.36725700 | 0.00000100  |
| C | 1.20848200  | -0.69759600 | -0.00000200 |
| H | 2.17705400  | 1.22280100  | -0.00000600 |
| H | -2.09093800 | 1.30756000  | -0.00000500 |
| H | -2.14702800 | -1.17654900 | 0.00000300  |

|   |             |             |             |
|---|-------------|-------------|-------------|
| H | -0.03162200 | -2.44866300 | 0.00000400  |
| H | 2.13395600  | -1.25818600 | -0.00000100 |
| C | 0.01740100  | 2.88452500  | -0.00001000 |
| O | -0.97197100 | 3.55749500  | -0.00001900 |
| O | 1.25494800  | 3.44776300  | -0.00000300 |
| H | 1.09503600  | 4.40065700  | -0.00000600 |

==> 1\_H\_y-100.gjf <==

|   |             |             |             |
|---|-------------|-------------|-------------|
| C | 1.24025300  | 0.68633500  | 0.00000000  |
| C | 0.04891000  | 1.40114400  | -0.00000600 |
| C | -1.17013900 | 0.73277700  | -0.00000800 |
| C | -1.19951000 | -0.65200500 | -0.00000500 |
| C | -0.00934800 | -1.36967200 | 0.00000100  |
| C | 1.20785000  | -0.70167400 | 0.00000300  |
| H | 2.17927900  | 1.22103000  | 0.00000200  |
| H | -2.07650500 | 1.32294100  | -0.00001100 |
| H | -2.15011500 | -1.16878600 | -0.00000600 |
| H | -0.03179700 | -2.45293300 | 0.00000400  |
| H | 2.13502200  | -1.25951200 | 0.00000800  |
| C | 0.01082000  | 2.89923200  | -0.00000800 |
| O | -1.00960900 | 3.52342500  | -0.00000500 |
| O | 1.23099900  | 3.44519900  | -0.00001300 |
| H | 1.13496200  | 4.41021200  | -0.00001400 |

==> 1\_H\_y+100.gjf <==

|   |             |             |             |
|---|-------------|-------------|-------------|
| C | 1.23271900  | 0.69250200  | -0.00000400 |
| C | 0.03395400  | 1.40575600  | -0.00000600 |
| C | -1.18467600 | 0.72809400  | -0.00000400 |
| C | -1.20238800 | -0.65556900 | -0.00000100 |
| C | -0.00657400 | -1.36551800 | 0.00000100  |
| C | 1.20865900  | -0.69186300 | 0.00000000  |
| H | 2.17416300  | 1.22188200  | -0.00000500 |
| H | -2.10325000 | 1.29804100  | -0.00000600 |
| H | -2.14248200 | -1.18859000 | 0.00000100  |
| H | -0.02182400 | -2.44692800 | 0.00000400  |
| H | 2.13358000  | -1.25089000 | 0.00000100  |
| C | 0.01868800  | 2.87765800  | -0.00000800 |
| O | -0.95822000 | 3.58974100  | -0.00001000 |
| O | 1.25784100  | 3.43642700  | -0.00001000 |
| H | 1.10088100  | 4.38697100  | -0.00001200 |

==> 1\_H\_y-125.gjf <==

|   |            |            |             |
|---|------------|------------|-------------|
| C | 1.24162100 | 0.68512200 | -0.00000500 |
| C | 0.05121000 | 1.40116900 | -0.00001000 |

|   |             |             |             |
|---|-------------|-------------|-------------|
| C | -1.16818100 | 0.73330300  | -0.00000800 |
| C | -1.19932300 | -0.65163800 | -0.00000300 |
| C | -0.00981900 | -1.37094500 | 0.00000300  |
| C | 1.20792900  | -0.70344100 | 0.00000200  |
| H | 2.18055400  | 1.22033900  | -0.00000600 |
| H | -2.07290600 | 1.32637200  | -0.00001000 |
| H | -2.15139900 | -1.16640100 | -0.00000200 |
| H | -0.03340900 | -2.45494500 | 0.00000800  |
| H | 2.13530100  | -1.26162900 | 0.00000700  |
| C | 0.00985800  | 2.90255100  | -0.00001200 |
| O | -1.01610000 | 3.51548100  | -0.00002200 |
| O | 1.22762700  | 3.44780400  | 0.00000000  |
| H | 1.13810900  | 4.41457100  | -0.00000100 |

==> 1\_H\_y+125.gjf <==

|   |             |             |             |
|---|-------------|-------------|-------------|
| C | 1.23217400  | 0.69286100  | -0.00000200 |
| C | 0.03242300  | 1.40709000  | -0.00000400 |
| C | -1.18646000 | 0.72738700  | -0.00000200 |
| C | -1.20297800 | -0.65608100 | -0.00000100 |
| C | -0.00632600 | -1.36573300 | 0.00000100  |
| C | 1.20898400  | -0.69107400 | 0.00000000  |
| H | 2.17407900  | 1.22150400  | -0.00000300 |
| H | -2.10649700 | 1.29507600  | -0.00000400 |
| H | -2.14188800 | -1.19120700 | -0.00000100 |
| H | -0.02087400 | -2.44740400 | 0.00000200  |
| H | 2.13355700  | -1.25071800 | 0.00000200  |
| C | 0.01971300  | 2.87541500  | -0.00000800 |
| O | -0.95185600 | 3.59857900  | -0.00000300 |
| O | 1.26138700  | 3.43673900  | -0.00001600 |
| H | 1.09563300  | 4.38527900  | -0.00001800 |

==> 1\_H\_y-150.gjf <==

|   |             |             |             |
|---|-------------|-------------|-------------|
| C | 1.24310400  | 0.68378700  | 0.00000400  |
| C | 0.05363800  | 1.40130300  | -0.00000500 |
| C | -1.16616000 | 0.73382800  | -0.00001100 |
| C | -1.19916600 | -0.65128800 | -0.00000900 |
| C | -0.01033000 | -1.37240100 | 0.00000000  |
| C | 1.20804600  | -0.70536000 | 0.00000800  |
| H | 2.18200400  | 1.21947000  | 0.00000900  |
| H | -2.06920300 | 1.32991600  | -0.00001600 |
| H | -2.15275900 | -1.16401500 | -0.00001400 |
| H | -0.03512100 | -2.45726400 | 0.00000200  |
| H | 2.13559100  | -1.26402800 | 0.00001600  |
| C | 0.00889400  | 2.90605600  | -0.00000400 |

|   |             |            |             |
|---|-------------|------------|-------------|
| O | -1.02262700 | 3.50756700 | 0.00002000  |
| O | 1.22419800  | 3.45080200 | -0.00003100 |
| H | 1.14096400  | 4.41934100 | -0.00002800 |

==> 1\_H\_y+150.gjf <==

|   |             |             |             |
|---|-------------|-------------|-------------|
| C | 1.23173000  | 0.69311600  | -0.00000400 |
| C | 0.03096000  | 1.40863300  | -0.00000600 |
| C | -1.18825500 | 0.72663900  | -0.00000300 |
| C | -1.20363800 | -0.65659800 | 0.00000100  |
| C | -0.00609700 | -1.36611800 | 0.00000300  |
| C | 1.20937800  | -0.69037000 | 0.00000000  |
| H | 2.17412400  | 1.22101600  | -0.00000700 |
| H | -2.10974700 | 1.29211500  | -0.00000500 |
| H | -2.14139200 | -1.19385700 | 0.00000400  |
| H | -0.01998800 | -2.44816100 | 0.00000600  |
| H | 2.13358600  | -1.25074300 | 0.00000100  |
| C | 0.02075400  | 2.87324200  | -0.00001200 |
| O | -0.94552300 | 3.60757800  | -0.00002400 |
| O | 1.26501500  | 3.43738300  | -0.00000200 |
| H | 1.09016600  | 4.38383800  | -0.00001000 |

==> 1\_H\_y-175.gjf <==

|   |             |             |             |
|---|-------------|-------------|-------------|
| C | 1.24471000  | 0.68231100  | 0.00000100  |
| C | 0.05618800  | 1.40154300  | -0.00000400 |
| C | -1.16406400 | 0.73435900  | -0.00000700 |
| C | -1.19903100 | -0.65097400 | -0.00000300 |
| C | -0.01089600 | -1.37404800 | 0.00000100  |
| C | 1.20820600  | -0.70742600 | 0.00000300  |
| H | 2.18363000  | 1.21842200  | 0.00000300  |
| H | -2.06540100 | 1.33355200  | -0.00001100 |
| H | -2.15420400 | -1.16160900 | -0.00000400 |
| H | -0.03690600 | -2.45990700 | 0.00000300  |
| H | 2.13587300  | -1.26674500 | 0.00000600  |
| C | 0.00793200  | 2.90977800  | -0.00000900 |
| O | -1.02918700 | 3.49970100  | -0.00001800 |
| O | 1.22069100  | 3.45421000  | -0.00000700 |
| H | 1.14353100  | 4.42454700  | -0.00001200 |

==> 1\_H\_y+175.gjf <==

|   |             |             |             |
|---|-------------|-------------|-------------|
| C | 1.23139600  | 0.69325600  | 0.00000000  |
| C | 0.02956900  | 1.41040000  | -0.00000400 |
| C | -1.19006300 | 0.72583900  | -0.00000500 |
| C | -1.20437700 | -0.65712100 | -0.00000100 |
| C | -0.00588900 | -1.36668200 | 0.00000300  |

|   |             |             |             |
|---|-------------|-------------|-------------|
| C | 1.20984900  | -0.68975300 | 0.00000300  |
| H | 2.17429900  | 1.22041100  | 0.00000000  |
| H | -2.11299600 | 1.28915100  | -0.00000900 |
| H | -2.14099900 | -1.19654500 | -0.00000100 |
| H | -0.01917200 | -2.44921400 | 0.00000600  |
| H | 2.13367000  | -1.25097100 | 0.00000600  |
| C | 0.02180700  | 2.87114500  | -0.00000800 |
| O | -0.93924400 | 3.61676200  | -0.00001200 |
| O | 1.26874100  | 3.43838200  | -0.00001400 |
| H | 1.08448200  | 4.38265300  | -0.00002100 |

==> 1\_H\_y-200.gjf <==

|   |             |             |             |
|---|-------------|-------------|-------------|
| C | 1.24642600  | 0.68071100  | 0.00000000  |
| C | 0.05888800  | 1.40188700  | -0.00000500 |
| C | -1.16190900 | 0.73487900  | -0.00000700 |
| C | -1.19893100 | -0.65065900 | -0.00000300 |
| C | -0.01148600 | -1.37589100 | 0.00000200  |
| C | 1.20839600  | -0.70967600 | 0.00000200  |
| H | 2.18546200  | 1.21713600  | 0.00000200  |
| H | -2.06150000 | 1.33729700  | -0.00001100 |
| H | -2.15570900 | -1.15922200 | -0.00000300 |
| H | -0.03884700 | -2.46288100 | 0.00000500  |
| H | 2.13618300  | -1.26974200 | 0.00000600  |
| C | 0.00697400  | 2.91372300  | -0.00001100 |
| O | -1.03577200 | 3.49185500  | -0.00002200 |
| O | 1.21712300  | 3.45806000  | -0.00000400 |
| H | 1.14577300  | 4.43023600  | -0.00000800 |

==> 1\_H\_y+200.gjf <==

|   |             |             |             |
|---|-------------|-------------|-------------|
| C | 1.23116800  | 0.69326800  | -0.00000200 |
| C | 0.02825800  | 1.41241900  | -0.00000500 |
| C | -1.19188700 | 0.72497800  | -0.00000400 |
| C | -1.20520400 | -0.65764400 | 0.00000000  |
| C | -0.00570700 | -1.36744700 | 0.00000300  |
| C | 1.21040100  | -0.68922500 | 0.00000300  |
| H | 2.17462800  | 1.21964200  | -0.00000300 |
| H | -2.11624500 | 1.28618100  | -0.00000700 |
| H | -2.14072900 | -1.19925700 | 0.00000000  |
| H | -0.01841700 | -2.45059000 | 0.00000600  |
| H | 2.13382100  | -1.25139800 | 0.00000500  |
| C | 0.02288600  | 2.86911100  | -0.00000900 |
| O | -0.93302500 | 3.62614400  | -0.00000600 |
| O | 1.27257100  | 3.43977500  | -0.00001900 |
| H | 1.07855300  | 4.38175700  | -0.00002200 |

==> 1\_H\_y-225.gjf <==

|   |             |             |             |
|---|-------------|-------------|-------------|
| C | 1.24828000  | 0.67894800  | -0.00000100 |
| C | 0.06177700  | 1.40232700  | -0.00000600 |
| C | -1.15966300 | 0.73538800  | -0.00000700 |
| C | -1.19886400 | -0.65034500 | -0.00000300 |
| C | -0.01211600 | -1.37794500 | 0.00000200  |
| C | 1.20862000  | -0.71213800 | 0.00000300  |
| H | 2.18753200  | 1.21556600  | 0.00000000  |
| H | -2.05744900 | 1.34119000  | -0.00001100 |
| H | -2.15728200 | -1.15683600 | -0.00000400 |
| H | -0.04097000 | -2.46621300 | 0.00000500  |
| H | 2.13651500  | -1.27306200 | 0.00000700  |
| C | 0.00600500  | 2.91793100  | -0.00001200 |
| O | -1.04242100 | 3.48400000  | -0.00002300 |
| O | 1.21345500  | 3.46241800  | -0.00000300 |
| H | 1.14765100  | 4.43648400  | -0.00000600 |

==> 1\_H\_y+225.gjf <==

|   |             |             |             |
|---|-------------|-------------|-------------|
| C | 1.23107700  | 0.69313100  | -0.00000100 |
| C | 0.02703500  | 1.41469100  | -0.00000300 |
| C | -1.19372800 | 0.72404800  | -0.00000200 |
| C | -1.20613100 | -0.65816800 | 0.00000200  |
| C | -0.00554800 | -1.36842300 | 0.00000400  |
| C | 1.21105000  | -0.68879400 | 0.00000200  |
| H | 2.17511600  | 1.21871300  | -0.00000300 |
| H | -2.11948100 | 1.28321000  | -0.00000500 |
| H | -2.14058500 | -1.20200100 | 0.00000200  |
| H | -0.01774500 | -2.45230100 | 0.00000600  |
| H | 2.13404400  | -1.25205200 | 0.00000400  |
| C | 0.02398500  | 2.86715200  | -0.00000900 |
| O | -0.92689800 | 3.63575700  | -0.00000600 |
| O | 1.27651800  | 3.44159700  | -0.00002200 |
| H | 1.07236600  | 4.38115300  | -0.00002600 |

==> 1\_H\_y-250.gjf <==

|   |             |             |             |
|---|-------------|-------------|-------------|
| C | 1.25041000  | 0.67693700  | -0.00000200 |
| C | 0.06492000  | 1.40281000  | -0.00000800 |
| C | -1.15725400 | 0.73595900  | -0.00000800 |
| C | -1.19883400 | -0.65002200 | -0.00000300 |
| C | -0.01286300 | -1.38019500 | 0.00000300  |
| C | 1.20891300  | -0.71481200 | 0.00000300  |
| H | 2.18995200  | 1.21365900  | -0.00000100 |
| H | -2.05315700 | 1.34533200  | -0.00001200 |

|   |             |             |             |
|---|-------------|-------------|-------------|
| H | -2.15897900 | -1.15433400 | -0.00000300 |
| H | -0.04323700 | -2.46990100 | 0.00000700  |
| H | 2.13678500  | -1.27692500 | 0.00000800  |
| C | 0.00509900  | 2.92236700  | -0.00001200 |
| O | -1.04917000 | 3.47596400  | -0.00002400 |
| O | 1.20955600  | 3.46743100  | -0.00000200 |
| H | 1.14893100  | 4.44344200  | -0.00000300 |

==> 1\_H\_y+250.gjf <==

|   |             |             |             |
|---|-------------|-------------|-------------|
| C | 1.23112900  | 0.69282500  | -0.00000400 |
| C | 0.02590600  | 1.41723600  | -0.00000600 |
| C | -1.19558900 | 0.72303700  | -0.00000100 |
| C | -1.20716900 | -0.65869000 | 0.00000400  |
| C | -0.00541900 | -1.36964100 | 0.00000600  |
| C | 1.21180500  | -0.68847000 | 0.00000200  |
| H | 2.17578400  | 1.21758500  | -0.00000800 |
| H | -2.12270900 | 1.28022500  | -0.00000300 |
| H | -2.14059000 | -1.20476800 | 0.00000700  |
| H | -0.01715700 | -2.45438700 | 0.00001000  |
| H | 2.13435100  | -1.25294200 | 0.00000300  |
| C | 0.02512500  | 2.86527900  | -0.00001300 |
| O | -0.92087400 | 3.64564300  | -0.00001600 |
| O | 1.28059000  | 3.44390400  | -0.00001600 |
| H | 1.06588900  | 4.38087600  | -0.00002300 |

==> 1\_H\_y-25.gjf <==

|   |             |             |             |
|---|-------------|-------------|-------------|
| C | 1.23673200  | 0.68935100  | -0.00000200 |
| C | 0.04264100  | 1.40179700  | -0.00000600 |
| C | -1.17576300 | 0.73114500  | -0.00000700 |
| C | -1.20026900 | -0.65322200 | -0.00000300 |
| C | -0.00811600 | -1.36689300 | 0.00000100  |
| C | 1.20782900  | -0.69716400 | 0.00000200  |
| H | 2.17635600  | 1.22223100  | 0.00000000  |
| H | -2.08690000 | 1.31310700  | -0.00001000 |
| H | -2.14668800 | -1.17603000 | -0.00000200 |
| H | -0.02749700 | -2.44863400 | 0.00000400  |
| H | 2.13428500  | -1.25463700 | 0.00000500  |
| C | 0.01372800  | 2.89025500  | -0.00000900 |
| O | -0.99023000 | 3.54763500  | -0.00001100 |
| O | 1.24097600  | 3.43950000  | -0.00000900 |
| H | 1.12398600  | 4.39927200  | -0.00001300 |

==> 1\_H\_y+25.gjf <==

|   |            |            |             |
|---|------------|------------|-------------|
| C | 1.23487500 | 0.69087200 | -0.00000200 |
|---|------------|------------|-------------|



|   |             |             |             |
|---|-------------|-------------|-------------|
| C | 0.03895400  | 1.40289200  | -0.00000600 |
| C | -1.17934800 | 0.73000100  | -0.00000600 |
| C | -1.20097100 | -0.65411000 | -0.00000300 |
| C | -0.00743600 | -1.36586100 | 0.00000100  |
| C | 1.20801900  | -0.69475600 | 0.00000200  |
| H | 2.17512300  | 1.22239300  | -0.00000100 |
| H | -2.09349600 | 1.30698400  | -0.00000900 |
| H | -2.14477400 | -1.18095100 | -0.00000300 |
| H | -0.02503900 | -2.44714500 | 0.00000400  |
| H | 2.13390200  | -1.25254600 | 0.00000500  |
| C | 0.01568500  | 2.88490900  | -0.00000900 |
| O | -0.97741000 | 3.56410700  | -0.00000900 |
| O | 1.24760200  | 3.43736300  | -0.00001100 |
| H | 1.11538400  | 4.39356100  | -0.00001300 |

==> 1\_H\_y-50.gjf <==

|   |             |             |             |
|---|-------------|-------------|-------------|
| C | 1.23780900  | 0.68844500  | -0.00000200 |
| C | 0.04463000  | 1.40145200  | -0.00000700 |
| C | -1.17392600 | 0.73169900  | -0.00000700 |
| C | -1.19998000 | -0.65279900 | -0.00000200 |
| C | -0.00849700 | -1.36765100 | 0.00000100  |
| C | 1.20779800  | -0.69854200 | 0.00000200  |
| H | 2.17718500  | 1.22196500  | 0.00000000  |
| H | -2.08349900 | 1.31630700  | -0.00001000 |
| H | -2.14775800 | -1.17359900 | -0.00000100 |
| H | -0.02884600 | -2.44978600 | 0.00000500  |
| H | 2.13451200  | -1.25602400 | 0.00000500  |
| C | 0.01275400  | 2.89310200  | -0.00001000 |
| O | -0.99667400 | 3.53950000  | -0.00001500 |
| O | 1.23766400  | 3.44105800  | -0.00000600 |
| H | 1.12790000  | 4.40258400  | -0.00001000 |

==> 1\_H\_y+50.gjf <==

|   |             |             |             |
|---|-------------|-------------|-------------|
| C | 1.23407500  | 0.69150100  | -0.00000400 |
| C | 0.03722300  | 1.40367100  | -0.00000600 |
| C | -1.18112200 | 0.72939600  | -0.00000400 |
| C | -1.20139000 | -0.65457900 | 0.00000000  |
| C | -0.00712900 | -1.36558600 | 0.00000200  |
| C | 1.20818200  | -0.69370300 | 0.00000000  |
| H | 2.17469000  | 1.22231800  | -0.00000500 |
| H | -2.09674900 | 1.30399200  | -0.00000600 |
| H | -2.14393000 | -1.18345900 | 0.00000100  |
| H | -0.02390800 | -2.44680300 | 0.00000500  |
| H | 2.13375600  | -1.25180600 | 0.00000100  |

|   |             |            |             |
|---|-------------|------------|-------------|
| C | 0.01667400  | 2.88239700 | -0.00001000 |
| O | -0.97101000 | 3.57250900 | -0.00001900 |
| O | 1.25095800  | 3.43675100 | -0.00000300 |
| H | 1.11075100  | 4.39111300 | -0.00000700 |

==> 1\_H\_y-75.gjf <==

|   |             |             |             |
|---|-------------|-------------|-------------|
| C | 1.23898400  | 0.68744000  | -0.00000300 |
| C | 0.04672000  | 1.40123500  | -0.00000600 |
| C | -1.17205200 | 0.73224300  | -0.00000500 |
| C | -1.19972800 | -0.65239200 | 0.00000000  |
| C | -0.00890800 | -1.36857600 | 0.00000200  |
| C | 1.20780600  | -0.70004400 | 0.00000000  |
| H | 2.17816000  | 1.22156600  | -0.00000400 |
| H | -2.08003000 | 1.31959200  | -0.00000800 |
| H | -2.14890100 | -1.17118400 | 0.00000100  |
| H | -0.03028000 | -2.45121600 | 0.00000500  |
| H | 2.13475800  | -1.25764800 | 0.00000200  |
| C | 0.01178400  | 2.89608800  | -0.00001200 |
| O | -1.00313600 | 3.53142700  | -0.00003000 |
| O | 1.23433900  | 3.44295600  | 0.00000300  |
| H | 1.13155500  | 4.40622500  | -0.00000200 |

==> 1\_H\_y+75.gjf <==

|   |             |             |             |
|---|-------------|-------------|-------------|
| C | 1.23335500  | 0.69204600  | -0.00000100 |
| C | 0.03555600  | 1.40462200  | -0.00000400 |
| C | -1.18289700 | 0.72876200  | -0.00000500 |
| C | -1.20186100 | -0.65506800 | -0.00000300 |
| C | -0.00684200 | -1.36547100 | 0.00000000  |
| C | 1.20839300  | -0.69273800 | 0.00000100  |
| H | 2.17436800  | 1.22215000  | -0.00000100 |
| H | -2.10000000 | 1.30101100  | -0.00000700 |
| H | -2.14316400 | -1.18600600 | -0.00000400 |
| H | -0.02283600 | -2.44673000 | 0.00000200  |
| H | 2.13364800  | -1.25125300 | 0.00000400  |
| C | 0.01767500  | 2.87998400  | -0.00000600 |
| O | -0.96461000 | 3.58105300  | 0.00000300  |
| O | 1.25436800  | 3.43643600  | -0.00001900 |
| H | 1.10591900  | 4.38891600  | -0.00001900 |

==> 1\_H\_z-05.gjf <==

|   |             |             |             |
|---|-------------|-------------|-------------|
| C | 1.23575800  | 0.69015700  | -0.00447100 |
| C | 0.04075300  | 1.40227400  | -0.00355100 |
| C | -1.17756600 | 0.73058800  | -0.00026300 |
| C | -1.20059500 | -0.65365200 | 0.00227800  |

|   |             |             |             |
|---|-------------|-------------|-------------|
| C | -0.00776400 | -1.36629200 | 0.00035300  |
| C | 1.20790200  | -0.69590400 | -0.00333900 |
| H | 2.17567100  | 1.22237500  | -0.00503000 |
| H | -2.09021800 | 1.31001800  | 0.00229000  |
| H | -2.14567900 | -1.17846500 | 0.00755400  |
| H | -0.02622400 | -2.44774600 | 0.00351100  |
| H | 2.13407600  | -1.25349000 | -0.00331400 |
| C | 0.01472600  | 2.88752900  | -0.00455100 |
| O | -0.98369900 | 3.55583600  | -0.01821900 |
| O | 1.24420400  | 3.43824700  | 0.01125000  |
| H | 1.11972700  | 4.39623800  | 0.01544400  |

==> 1\_H\_z+05.gjf <==

|   |             |             |             |
|---|-------------|-------------|-------------|
| C | 1.23575700  | 0.69015600  | 0.00447300  |
| C | 0.04075500  | 1.40227400  | 0.00354000  |
| C | -1.17756400 | 0.73058900  | 0.00024400  |
| C | -1.20059300 | -0.65365000 | -0.00228100 |
| C | -0.00776300 | -1.36629300 | -0.00034400 |
| C | 1.20790100  | -0.69590600 | 0.00334600  |
| H | 2.17567400  | 1.22236700  | 0.00503600  |
| H | -2.09021900 | 1.31001600  | -0.00232000 |
| H | -2.14567800 | -1.17846200 | -0.00755600 |
| H | -0.02622900 | -2.44774700 | -0.00349700 |
| H | 2.13407800  | -1.25348600 | 0.00332500  |
| C | 0.01472700  | 2.88753000  | 0.00452500  |
| O | -0.98369900 | 3.55583500  | 0.01816700  |
| O | 1.24420500  | 3.43825000  | -0.01125300 |
| H | 1.11972200  | 4.39624000  | -0.01546400 |

==> 1\_H\_z-100.gjf <==

|   |             |             |             |
|---|-------------|-------------|-------------|
| C | 1.23646400  | 0.68874500  | -0.08941600 |
| C | 0.04261600  | 1.40265800  | -0.07188700 |
| C | -1.17561500 | 0.73425600  | -0.00614500 |
| C | -1.19902900 | -0.64965200 | 0.04604200  |
| C | -0.00827500 | -1.36485100 | 0.00931400  |
| C | 1.20711100  | -0.69712300 | -0.06450300 |
| H | 2.17718000  | 1.22017200  | -0.10039000 |
| H | -2.08671700 | 1.31421800  | 0.04401300  |
| H | -2.14073300 | -1.17047900 | 0.14971500  |
| H | -0.02627500 | -2.44440600 | 0.07391400  |
| H | 2.13281200  | -1.25571500 | -0.06234900 |
| C | 0.02351100  | 2.88841300  | -0.09094400 |
| O | -0.94005500 | 3.55638400  | -0.36105100 |
| O | 1.21303300  | 3.43035000  | 0.22076000  |

|                       |             |             |             |
|-----------------------|-------------|-------------|-------------|
| H                     | 1.08504300  | 4.38474200  | 0.30286900  |
| ==> 1_H_z+100.gjf <== |             |             |             |
| C                     | 1.23646400  | 0.68874500  | 0.08941600  |
| C                     | 0.04261600  | 1.40265900  | 0.07187700  |
| C                     | -1.17561500 | 0.73425600  | 0.00613100  |
| C                     | -1.19902900 | -0.64965200 | -0.04605000 |
| C                     | -0.00827400 | -1.36485100 | -0.00931200 |
| C                     | 1.20711100  | -0.69712200 | 0.06450900  |
| H                     | 2.17718000  | 1.22017200  | 0.10039100  |
| H                     | -2.08671700 | 1.31421700  | -0.04403400 |
| H                     | -2.14073200 | -1.17048000 | -0.14972500 |
| H                     | -0.02627500 | -2.44440600 | -0.07390600 |
| H                     | 2.13281200  | -1.25571400 | 0.06236300  |
| C                     | 0.02351100  | 2.88841400  | 0.09092700  |
| O                     | -0.94005500 | 3.55638500  | 0.36103300  |
| O                     | 1.21303200  | 3.43034900  | -0.22078300 |
| H                     | 1.08504300  | 4.38474100  | -0.30289500 |

|                      |             |             |             |
|----------------------|-------------|-------------|-------------|
| ==> 1_H_z-10.gjf <== |             |             |             |
| C                    | 1.23575600  | 0.69015000  | -0.00892000 |
| C                    | 0.04076200  | 1.40227900  | -0.00712900 |
| C                    | -1.17755600 | 0.73061500  | -0.00055400 |
| C                    | -1.20058100 | -0.65362200 | 0.00456700  |
| C                    | -0.00776400 | -1.36628100 | 0.00077100  |
| C                    | 1.20789500  | -0.69591100 | -0.00660400 |
| H                    | 2.17567800  | 1.22235700  | -0.01004300 |
| H                    | -2.09020400 | 1.31003700  | 0.00451500  |
| H                    | -2.14563700 | -1.17841000 | 0.01510600  |
| H                    | -0.02622500 | -2.44772100 | 0.00712800  |
| H                    | 2.13407200  | -1.25349200 | -0.00650400 |
| C                    | 0.01479500  | 2.88753700  | -0.00916900 |
| O                    | -0.98335500 | 3.55585600  | -0.03660300 |
| O                    | 1.24397100  | 3.43817800  | 0.02251300  |
| H                    | 1.11946400  | 4.39614100  | 0.03087000  |

|                      |             |             |             |
|----------------------|-------------|-------------|-------------|
| ==> 1_H_z+10.gjf <== |             |             |             |
| C                    | 1.23575600  | 0.69015000  | 0.00891400  |
| C                    | 0.04076200  | 1.40227900  | 0.00712000  |
| C                    | -1.17755600 | 0.73061500  | 0.00054600  |
| C                    | -1.20058200 | -0.65362200 | -0.00457200 |
| C                    | -0.00776400 | -1.36628100 | -0.00077400 |
| C                    | 1.20789400  | -0.69591100 | 0.00660000  |
| H                    | 2.17567800  | 1.22235700  | 0.01003700  |

|   |             |             |             |
|---|-------------|-------------|-------------|
| H | -2.09020400 | 1.31003700  | -0.00452500 |
| H | -2.14563700 | -1.17841000 | -0.01511100 |
| H | -0.02622500 | -2.44772100 | -0.00712900 |
| H | 2.13407200  | -1.25349200 | 0.00650300  |
| C | 0.01479500  | 2.88753700  | 0.00915600  |
| O | -0.98335400 | 3.55585600  | 0.03658800  |
| O | 1.24397100  | 3.43817800  | -0.02252500 |
| H | 1.11946400  | 4.39614100  | -0.03088500 |

==> 1\_H\_z-15.gjf <==

|   |             |             |             |
|---|-------------|-------------|-------------|
| C | 1.23575900  | 0.69013500  | -0.01335500 |
| C | 0.04077200  | 1.40228600  | -0.01070200 |
| C | -1.17754000 | 0.73065800  | -0.00085100 |
| C | -1.20056300 | -0.65358000 | 0.00685600  |
| C | -0.00777100 | -1.36626200 | 0.00119800  |
| C | 1.20788600  | -0.69591800 | -0.00985300 |
| H | 2.17568300  | 1.22234700  | -0.01502900 |
| H | -2.09017400 | 1.31008100  | 0.00672100  |
| H | -2.14557200 | -1.17832100 | 0.02265500  |
| H | -0.02621200 | -2.44767900 | 0.01075500  |
| H | 2.13405500  | -1.25351700 | -0.00967900 |
| C | 0.01490900  | 2.88754900  | -0.01379100 |
| O | -0.98278000 | 3.55588900  | -0.05499000 |
| O | 1.24358000  | 3.43806400  | 0.03375900  |
| H | 1.11903800  | 4.39598200  | 0.04624700  |

==> 1\_H\_z+15.gjf <==

|   |             |             |             |
|---|-------------|-------------|-------------|
| C | 1.23575900  | 0.69012200  | 0.01334800  |
| C | 0.04076800  | 1.40229300  | 0.01069300  |
| C | -1.17753100 | 0.73065300  | 0.00084200  |
| C | -1.20055400 | -0.65358900 | -0.00686500 |
| C | -0.00777900 | -1.36626200 | -0.00119200 |
| C | 1.20789100  | -0.69591100 | 0.00986600  |
| H | 2.17566300  | 1.22236400  | 0.01501500  |
| H | -2.09016500 | 1.31007600  | -0.00673100 |
| H | -2.14557600 | -1.17830400 | -0.02267500 |
| H | -0.02619400 | -2.44767800 | -0.01074300 |
| H | 2.13404900  | -1.25352300 | 0.00970700  |
| C | 0.01490000  | 2.88755500  | 0.01377300  |
| O | -0.98278700 | 3.55590300  | 0.05494500  |
| O | 1.24357800  | 3.43804900  | -0.03376300 |
| H | 1.11905100  | 4.39596500  | -0.04627800 |

==> 1\_H\_z-20.gjf <==

|   |             |             |             |
|---|-------------|-------------|-------------|
| C | 1.23576400  | 0.69011700  | -0.01780600 |
| C | 0.04079400  | 1.40229500  | -0.01427100 |
| C | -1.17751400 | 0.73072100  | -0.00113400 |
| C | -1.20053400 | -0.65351200 | 0.00915000  |
| C | -0.00777900 | -1.36623200 | 0.00161000  |
| C | 1.20787300  | -0.69592900 | -0.01313000 |
| H | 2.17569500  | 1.22232700  | -0.02003800 |
| H | -2.09012600 | 1.31014600  | 0.00895700  |
| H | -2.14547800 | -1.17819000 | 0.03020900  |
| H | -0.02620300 | -2.44761700 | 0.01435800  |
| H | 2.13403400  | -1.25354400 | -0.01289700 |
| C | 0.01506700  | 2.88756100  | -0.01838400 |
| O | -0.98198600 | 3.55591900  | -0.07327800 |
| O | 1.24303200  | 3.43789900  | 0.04498100  |
| H | 1.11843200  | 4.39575300  | 0.06161600  |

==> 1\_H\_z+20.gjf <==

|   |             |             |             |
|---|-------------|-------------|-------------|
| C | 1.23575600  | 0.69012300  | 0.01781700  |
| C | 0.04079100  | 1.40229700  | 0.01426200  |
| C | -1.17751800 | 0.73072000  | 0.00111200  |
| C | -1.20053400 | -0.65351100 | -0.00916300 |
| C | -0.00777400 | -1.36623500 | -0.00160400 |
| C | 1.20787000  | -0.69593200 | 0.01314700  |
| H | 2.17569900  | 1.22231300  | 0.02006200  |
| H | -2.09013800 | 1.31013100  | -0.00899800 |
| H | -2.14547400 | -1.17819500 | -0.03022700 |
| H | -0.02621000 | -2.44761900 | -0.01434700 |
| H | 2.13404200  | -1.25352900 | 0.01292500  |
| C | 0.01506900  | 2.88756700  | 0.01836900  |
| O | -0.98197800 | 3.55592800  | 0.07329200  |
| O | 1.24303700  | 3.43790000  | -0.04503100 |
| H | 1.11843500  | 4.39575500  | -0.06167100 |

==> 1\_H\_z-25.gjf <==

|   |             |             |             |
|---|-------------|-------------|-------------|
| C | 1.23576300  | 0.69009800  | -0.02225700 |
| C | 0.04081900  | 1.40230900  | -0.01783000 |
| C | -1.17748500 | 0.73080100  | -0.00140700 |
| C | -1.20049900 | -0.65342500 | 0.01144100  |
| C | -0.00778300 | -1.36620000 | 0.00202000  |
| C | 1.20785200  | -0.69595100 | -0.01640300 |
| H | 2.17572000  | 1.22227700  | -0.02505200 |
| H | -2.09007900 | 1.31021000  | 0.01121400  |
| H | -2.14535500 | -1.17802900 | 0.03773900  |
| H | -0.02620200 | -2.44754200 | 0.01795700  |

|   |             |             |             |
|---|-------------|-------------|-------------|
| H | 2.13401600  | -1.25356600 | -0.01610200 |
| C | 0.01527100  | 2.88758600  | -0.02295500 |
| O | -0.98096500 | 3.55596600  | -0.09148600 |
| O | 1.24233800  | 3.43770300  | 0.05613900  |
| H | 1.11765900  | 4.39547600  | 0.07692600  |

==> 1\_H\_z+25.gjf <==

|   |             |             |             |
|---|-------------|-------------|-------------|
| C | 1.23576900  | 0.69009500  | 0.02225500  |
| C | 0.04081900  | 1.40230800  | 0.01781800  |
| C | -1.17748100 | 0.73080100  | 0.00139300  |
| C | -1.20049700 | -0.65342800 | -0.01144600 |
| C | -0.00778800 | -1.36619500 | -0.00201400 |
| C | 1.20785600  | -0.69594200 | 0.01641200  |
| H | 2.17571100  | 1.22229700  | 0.02504700  |
| H | -2.09007100 | 1.31021900  | -0.01123200 |
| H | -2.14535800 | -1.17802200 | -0.03775100 |
| H | -0.02619000 | -2.44753800 | -0.01794100 |
| H | 2.13400900  | -1.25357400 | 0.01612700  |
| C | 0.01526700  | 2.88758100  | 0.02292700  |
| O | -0.98097400 | 3.55596300  | 0.09142300  |
| O | 1.24233700  | 3.43768900  | -0.05614200 |
| H | 1.11766400  | 4.39545900  | -0.07693600 |

==> 1\_H\_z-30.gjf <==

|   |             |             |             |
|---|-------------|-------------|-------------|
| C | 1.23578000  | 0.69006300  | -0.02668000 |
| C | 0.04085800  | 1.40232200  | -0.02137800 |
| C | -1.17743700 | 0.73089900  | -0.00169300 |
| C | -1.20045400 | -0.65332200 | 0.01371100  |
| C | -0.00780000 | -1.36615400 | 0.00243200  |
| C | 1.20783400  | -0.69596800 | -0.01964900 |
| H | 2.17574100  | 1.22224900  | -0.03001000 |
| H | -2.08999300 | 1.31032000  | 0.01343600  |
| H | -2.14521500 | -1.17781600 | 0.04522500  |
| H | -0.02618400 | -2.44744600 | 0.02155100  |
| H | 2.13397700  | -1.25362300 | -0.01927300 |
| C | 0.01551000  | 2.88760700  | -0.02748500 |
| O | -0.97975700 | 3.55599900  | -0.10946300 |
| O | 1.24149100  | 3.43745800  | 0.06712700  |
| H | 1.11672200  | 4.39512600  | 0.09209000  |

==> 1\_H\_z+30.gjf <==

|   |             |            |            |
|---|-------------|------------|------------|
| C | 1.23577600  | 0.69005500 | 0.02671100 |
| C | 0.04084800  | 1.40233600 | 0.02134100 |
| C | -1.17742900 | 0.73090500 | 0.00164300 |

|   |             |             |             |
|---|-------------|-------------|-------------|
| C | -1.20044400 | -0.65333600 | -0.01372800 |
| C | -0.00780700 | -1.36615900 | -0.00237300 |
| C | 1.20783700  | -0.69595800 | 0.01974000  |
| H | 2.17572900  | 1.22225400  | 0.03005600  |
| H | -2.08999800 | 1.31029200  | -0.01353300 |
| H | -2.14522000 | -1.17779500 | -0.04527100 |
| H | -0.02616200 | -2.44744900 | -0.02146100 |
| H | 2.13397500  | -1.25361500 | 0.01942300  |
| C | 0.01550300  | 2.88760900  | 0.02741600  |
| O | -0.97975200 | 3.55599900  | 0.10939200  |
| O | 1.24149100  | 3.43745300  | -0.06719300 |
| H | 1.11672500  | 4.39512200  | -0.09222200 |

==> 1\_H\_z-35.gjf <==

|   |             |             |             |
|---|-------------|-------------|-------------|
| C | 1.23579500  | 0.69002400  | -0.03112600 |
| C | 0.04090900  | 1.40233800  | -0.02490100 |
| C | -1.17738200 | 0.73101500  | -0.00195400 |
| C | -1.20040300 | -0.65319800 | 0.01596200  |
| C | -0.00781000 | -1.36610900 | 0.00278900  |
| C | 1.20780800  | -0.69600500 | -0.02294400 |
| H | 2.17578700  | 1.22217500  | -0.03499200 |
| H | -2.08989600 | 1.31043400  | 0.01572600  |
| H | -2.14504300 | -1.17757500 | 0.05266800  |
| H | -0.02618100 | -2.44734000 | 0.02506900  |
| H | 2.13394200  | -1.25368300 | -0.02250100 |
| C | 0.01579600  | 2.88764300  | -0.03193700 |
| O | -0.97834800 | 3.55603100  | -0.12723100 |
| O | 1.24049900  | 3.43720900  | 0.07806400  |
| H | 1.11559900  | 4.39475400  | 0.10724900  |

==> 1\_H\_z+35.gjf <==

|   |             |             |             |
|---|-------------|-------------|-------------|
| C | 1.23579500  | 0.69001500  | 0.03111400  |
| C | 0.04090100  | 1.40235100  | 0.02488100  |
| C | -1.17737200 | 0.73102200  | 0.00194500  |
| C | -1.20039400 | -0.65321100 | -0.01597500 |
| C | -0.00782200 | -1.36611300 | -0.00278400 |
| C | 1.20781100  | -0.69599300 | 0.02296400  |
| H | 2.17577400  | 1.22218800  | 0.03498100  |
| H | -2.08990000 | 1.31041300  | -0.01573600 |
| H | -2.14505400 | -1.17754800 | -0.05269600 |
| H | -0.02616000 | -2.44734200 | -0.02505700 |
| H | 2.13393600  | -1.25368000 | 0.02254200  |
| C | 0.01578800  | 2.88764000  | 0.03191900  |
| O | -0.97834200 | 3.55602900  | 0.12721300  |



|   |            |            |             |
|---|------------|------------|-------------|
| O | 1.24050200 | 3.43719800 | -0.07806300 |
| H | 1.11560900 | 4.39474400 | -0.10730600 |

==> 1\_H\_z-40.gjf <==

|   |             |             |             |
|---|-------------|-------------|-------------|
| C | 1.23582100  | 0.68997400  | -0.03553000 |
| C | 0.04097700  | 1.40235500  | -0.02844400 |
| C | -1.17731100 | 0.73115300  | -0.00226200 |
| C | -1.20034500 | -0.65305000 | 0.01820300  |
| C | -0.00782900 | -1.36605500 | 0.00320700  |
| C | 1.20777900  | -0.69604800 | -0.02615400 |
| H | 2.17584400  | 1.22209400  | -0.03991300 |
| H | -2.08977200 | 1.31058500  | 0.01791700  |
| H | -2.14485400 | -1.17728400 | 0.06006900  |
| H | -0.02618300 | -2.44721600 | 0.02867900  |
| H | 2.13389600  | -1.25376300 | -0.02559300 |
| C | 0.01612200  | 2.88767600  | -0.03642300 |
| O | -0.97674700 | 3.55604900  | -0.14495200 |
| O | 1.23936000  | 3.43692000  | 0.08886400  |
| H | 1.11431200  | 4.39432100  | 0.12227400  |

==> 1\_H\_z+40.gjf <==

|   |             |             |             |
|---|-------------|-------------|-------------|
| C | 1.23582100  | 0.68997500  | 0.03553100  |
| C | 0.04097700  | 1.40235600  | 0.02843200  |
| C | -1.17731000 | 0.73115300  | 0.00224700  |
| C | -1.20034400 | -0.65305100 | -0.01820900 |
| C | -0.00782900 | -1.36605500 | -0.00320100 |
| C | 1.20777900  | -0.69604700 | 0.02616400  |
| H | 2.17584400  | 1.22209500  | 0.03991600  |
| H | -2.08977200 | 1.31058400  | -0.01794200 |
| H | -2.14485400 | -1.17728400 | -0.06007800 |
| H | -0.02618200 | -2.44721700 | -0.02866400 |
| H | 2.13389600  | -1.25376200 | 0.02561400  |
| C | 0.01612200  | 2.88767700  | 0.03640000  |
| O | -0.97674800 | 3.55605000  | 0.14491900  |
| O | 1.23936100  | 3.43691900  | -0.08888400 |
| H | 1.11431300  | 4.39432000  | -0.12230200 |

==> 1\_H\_z-45.gjf <==

|   |             |             |             |
|---|-------------|-------------|-------------|
| C | 1.23585500  | 0.68991500  | -0.03994800 |
| C | 0.04106100  | 1.40237300  | -0.03200000 |
| C | -1.17722500 | 0.73131100  | -0.00257500 |
| C | -1.20027900 | -0.65287900 | 0.02045300  |
| C | -0.00785100 | -1.36599300 | 0.00363800  |
| C | 1.20774700  | -0.69610000 | -0.02936200 |

|   |             |             |             |
|---|-------------|-------------|-------------|
| H | 2.17591500  | 1.22199800  | -0.04485300 |
| H | -2.08962100 | 1.31076400  | 0.02010200  |
| H | -2.14464200 | -1.17694700 | 0.06747600  |
| H | -0.02618900 | -2.44707500 | 0.03231300  |
| H | 2.13384200  | -1.25386000 | -0.02868100 |
| C | 0.01649200  | 2.88771300  | -0.04091100 |
| O | -0.97494700 | 3.55605700  | -0.16266400 |
| O | 1.23806800  | 3.43660000  | 0.09966100  |
| H | 1.11284600  | 4.39383700  | 0.13729300  |

==> 1\_H\_z+45.gjf <==

|   |             |             |             |
|---|-------------|-------------|-------------|
| C | 1.23585500  | 0.68991500  | 0.03994900  |
| C | 0.04106100  | 1.40237300  | 0.03198800  |
| C | -1.17722500 | 0.73131100  | 0.00255900  |
| C | -1.20027800 | -0.65288000 | -0.02045900 |
| C | -0.00785100 | -1.36599400 | -0.00363200 |
| C | 1.20774700  | -0.69609900 | 0.02937200  |
| H | 2.17591500  | 1.22199800  | 0.04485600  |
| H | -2.08962200 | 1.31076300  | -0.02012800 |
| H | -2.14464200 | -1.17694700 | -0.06748500 |
| H | -0.02618800 | -2.44707600 | -0.03229900 |
| H | 2.13384300  | -1.25385900 | 0.02870200  |
| C | 0.01649200  | 2.88771400  | 0.04088800  |
| O | -0.97494800 | 3.55605800  | 0.16263100  |
| O | 1.23806900  | 3.43659900  | -0.09968000 |
| H | 1.11284700  | 4.39383600  | -0.13732100 |

==> 1\_H\_z-50.gjf <==

|   |             |             |             |
|---|-------------|-------------|-------------|
| C | 1.23589800  | 0.68984500  | -0.04439300 |
| C | 0.04116200  | 1.40239200  | -0.03557400 |
| C | -1.17712600 | 0.73149000  | -0.00288700 |
| C | -1.20020500 | -0.65268500 | 0.02272600  |
| C | -0.00787800 | -1.36592400 | 0.00408500  |
| C | 1.20771100  | -0.69616200 | -0.03258000 |
| H | 2.17600000  | 1.22188400  | -0.04983400 |
| H | -2.08944500 | 1.31097300  | 0.02229100  |
| H | -2.14440600 | -1.17656300 | 0.07491600  |
| H | -0.02620100 | -2.44691700 | 0.03598000  |
| H | 2.13378100  | -1.25397600 | -0.03178500 |
| C | 0.01690800  | 2.88775300  | -0.04541700 |
| O | -0.97293400 | 3.55605600  | -0.18045900 |
| O | 1.23661300  | 3.43624800  | 0.11051900  |
| H | 1.11119400  | 4.39330100  | 0.15235400  |

==> 1\_H\_z+50.gjf <==

|   |             |             |             |
|---|-------------|-------------|-------------|
| C | 1.23589700  | 0.68984500  | 0.04439400  |
| C | 0.04116100  | 1.40239200  | 0.03556200  |
| C | -1.17712500 | 0.73149000  | 0.00287100  |
| C | -1.20020400 | -0.65268500 | -0.02273200 |
| C | -0.00787700 | -1.36592500 | -0.00407900 |
| C | 1.20771100  | -0.69616100 | 0.03259000  |
| H | 2.17599900  | 1.22188500  | 0.04983700  |
| H | -2.08944500 | 1.31097200  | -0.02231700 |
| H | -2.14440600 | -1.17656400 | -0.07492500 |
| H | -0.02620000 | -2.44691700 | -0.03596600 |
| H | 2.13378100  | -1.25397500 | 0.03180500  |
| C | 0.01690700  | 2.88775400  | 0.04539500  |
| O | -0.97293500 | 3.55605700  | 0.18042600  |
| O | 1.23661400  | 3.43624700  | -0.11053800 |
| H | 1.11119400  | 4.39330000  | -0.15238100 |

==> 1\_H\_z-55.gjf <==

|   |             |             |             |
|---|-------------|-------------|-------------|
| C | 1.23594800  | 0.68976300  | -0.04886400 |
| C | 0.04127800  | 1.40241100  | -0.03916900 |
| C | -1.17701100 | 0.73169000  | -0.00319800 |
| C | -1.20012200 | -0.65246700 | 0.02502500  |
| C | -0.00790800 | -1.36584800 | 0.00455400  |
| C | 1.20767100  | -0.69623400 | -0.03580400 |
| H | 2.17609800  | 1.22175300  | -0.05485600 |
| H | -2.08924100 | 1.31121100  | 0.02448100  |
| H | -2.14414700 | -1.17613200 | 0.08239500  |
| H | -0.02621800 | -2.44674100 | 0.03968500  |
| H | 2.13371000  | -1.25411000 | -0.03490200 |
| C | 0.01737100  | 2.88779700  | -0.04995400 |
| O | -0.97069400 | 3.55604500  | -0.19839300 |
| O | 1.23498800  | 3.43586200  | 0.12147000  |
| H | 1.10934900  | 4.39271400  | 0.16747100  |

==> 1\_H\_z+55.gjf <==

|   |             |             |             |
|---|-------------|-------------|-------------|
| C | 1.23594800  | 0.68976400  | 0.04886300  |
| C | 0.04127800  | 1.40241100  | 0.03915700  |
| C | -1.17701100 | 0.73168900  | 0.00318400  |
| C | -1.20012200 | -0.65246700 | -0.02503100 |
| C | -0.00790800 | -1.36584800 | -0.00454900 |
| C | 1.20767100  | -0.69623400 | 0.03581200  |
| H | 2.17609700  | 1.22175400  | 0.05485700  |
| H | -2.08924100 | 1.31121000  | -0.02450400 |
| H | -2.14414600 | -1.17613300 | -0.08240300 |

|   |             |             |             |
|---|-------------|-------------|-------------|
| H | -0.02621700 | -2.44674200 | -0.03967300 |
| H | 2.13371000  | -1.25410900 | 0.03491900  |
| C | 0.01737000  | 2.88779700  | 0.04993300  |
| O | -0.97069600 | 3.55604600  | 0.19836300  |
| O | 1.23498800  | 3.43586100  | -0.12148900 |
| H | 1.10935000  | 4.39271300  | -0.16749700 |

==> 1\_H\_z-60.gjf <==

|   |             |             |             |
|---|-------------|-------------|-------------|
| C | 1.23600700  | 0.68967100  | -0.05333300 |
| C | 0.04141000  | 1.40243000  | -0.04278500 |
| C | -1.17688200 | 0.73191000  | -0.00353100 |
| C | -1.20003200 | -0.65222500 | 0.02733800  |
| C | -0.00794300 | -1.36576500 | 0.00506000  |
| C | 1.20762700  | -0.69631600 | -0.03899900 |
| H | 2.17620800  | 1.22160500  | -0.05987500 |
| H | -2.08901300 | 1.31147800  | 0.02662800  |
| H | -2.14386500 | -1.17565300 | 0.08988400  |
| H | -0.02624000 | -2.44654700 | 0.04345100  |
| H | 2.13363100  | -1.25426200 | -0.03797300 |
| C | 0.01788200  | 2.88784400  | -0.05453700 |
| O | -0.96821600 | 3.55602600  | -0.21649400 |
| O | 1.23318800  | 3.43544100  | 0.13249600  |
| H | 1.10731200  | 4.39207600  | 0.18261200  |

==> 1\_H\_z+60.gjf <==

|   |             |             |             |
|---|-------------|-------------|-------------|
| C | 1.23600600  | 0.68967200  | 0.05333200  |
| C | 0.04140900  | 1.40243100  | 0.04277400  |
| C | -1.17688200 | 0.73191000  | 0.00351700  |
| C | -1.20003200 | -0.65222600 | -0.02734400 |
| C | -0.00794300 | -1.36576500 | -0.00505500 |
| C | 1.20762700  | -0.69631600 | 0.03900600  |
| H | 2.17620800  | 1.22160600  | 0.05987600  |
| H | -2.08901300 | 1.31147700  | -0.02665000 |
| H | -2.14386400 | -1.17565400 | -0.08989100 |
| H | -0.02623900 | -2.44654800 | -0.04344000 |
| H | 2.13363100  | -1.25426200 | 0.03798800  |
| C | 0.01788100  | 2.88784400  | 0.05451700  |
| O | -0.96821800 | 3.55602800  | 0.21646600  |
| O | 1.23318900  | 3.43544000  | -0.13251500 |
| H | 1.10731300  | 4.39207500  | -0.18263800 |

==> 1\_H\_z-65.gjf <==

|   |            |            |             |
|---|------------|------------|-------------|
| C | 1.23606700 | 0.68957400 | -0.05780800 |
| C | 0.04155300 | 1.40245200 | -0.04641600 |

|   |             |             |             |
|---|-------------|-------------|-------------|
| C | -1.17674500 | 0.73215200  | -0.00386700 |
| C | -1.19993500 | -0.65196100 | 0.02966300  |
| C | -0.00798000 | -1.36567600 | 0.00558200  |
| C | 1.20757700  | -0.69640700 | -0.04218500 |
| H | 2.17633100  | 1.22144100  | -0.06491100 |
| H | -2.08877200 | 1.31176500  | 0.02877800  |
| H | -2.14356300 | -1.17513000 | 0.09737000  |
| H | -0.02626700 | -2.44634000 | 0.04724100  |
| H | 2.13355100  | -1.25441900 | -0.04102200 |
| C | 0.01844000  | 2.88789300  | -0.05913600 |
| O | -0.96550200 | 3.55601200  | -0.23465400 |
| O | 1.23122800  | 3.43497900  | 0.14354100  |
| H | 1.10508900  | 4.39138000  | 0.19776700  |

==> 1\_H\_z+65.gjf <==

|   |             |             |             |
|---|-------------|-------------|-------------|
| C | 1.23606600  | 0.68957400  | 0.05780600  |
| C | 0.04155200  | 1.40245200  | 0.04640400  |
| C | -1.17674500 | 0.73215200  | 0.00385400  |
| C | -1.19993500 | -0.65196100 | -0.02966800 |
| C | -0.00798000 | -1.36567600 | -0.00557800 |
| C | 1.20757700  | -0.69640700 | 0.04219100  |
| H | 2.17633100  | 1.22144200  | 0.06491000  |
| H | -2.08877200 | 1.31176400  | -0.02879800 |
| H | -2.14356200 | -1.17513100 | -0.09737700 |
| H | -0.02626700 | -2.44634000 | -0.04723000 |
| H | 2.13355100  | -1.25441900 | 0.04103600  |
| C | 0.01844000  | 2.88789300  | 0.05911600  |
| O | -0.96550400 | 3.55601300  | 0.23462500  |
| O | 1.23122900  | 3.43497800  | -0.14355800 |
| H | 1.10509000  | 4.39137900  | -0.19779100 |

==> 1\_H\_z-70.gjf <==

|   |             |             |             |
|---|-------------|-------------|-------------|
| C | 1.23613100  | 0.68946700  | -0.06228900 |
| C | 0.04169900  | 1.40247400  | -0.05004300 |
| C | -1.17659800 | 0.73240800  | -0.00420200 |
| C | -1.19983000 | -0.65168100 | 0.03199100  |
| C | -0.00802200 | -1.36557800 | 0.00610700  |
| C | 1.20752500  | -0.69650000 | -0.04537000 |
| H | 2.17645200  | 1.22127700  | -0.06994200 |
| H | -2.08850900 | 1.31207500  | 0.03092000  |
| H | -2.14323500 | -1.17456900 | 0.10485900  |
| H | -0.02628500 | -2.44611300 | 0.05103500  |
| H | 2.13345700  | -1.25459600 | -0.04407800 |
| C | 0.01903800  | 2.88795000  | -0.06371900 |

|   |             |            |             |
|---|-------------|------------|-------------|
| O | -0.96256500 | 3.55600600 | -0.25279100 |
| O | 1.22910500  | 3.43447000 | 0.15458700  |
| H | 1.10270900  | 4.39062300 | 0.21287700  |

==> 1\_H\_z+70.gjf <==

|   |             |             |             |
|---|-------------|-------------|-------------|
| C | 1.23613100  | 0.68946700  | 0.06228700  |
| C | 0.04169900  | 1.40247500  | 0.05003100  |
| C | -1.17659800 | 0.73240700  | 0.00418800  |
| C | -1.19983000 | -0.65168100 | -0.03199600 |
| C | -0.00802100 | -1.36557800 | -0.00610200 |
| C | 1.20752500  | -0.69650000 | 0.04537600  |
| H | 2.17645200  | 1.22127800  | 0.06994100  |
| H | -2.08850800 | 1.31207500  | -0.03094000 |
| H | -2.14323400 | -1.17457000 | -0.10486600 |
| H | -0.02628500 | -2.44611300 | -0.05102500 |
| H | 2.13345700  | -1.25459600 | 0.04409100  |
| C | 0.01903800  | 2.88795000  | 0.06369900  |
| O | -0.96256700 | 3.55600700  | 0.25276300  |
| O | 1.22910500  | 3.43447000  | -0.15460500 |
| H | 1.10271000  | 4.39062200  | -0.21290100 |

==> 1\_H\_z-75.gjf <==

|   |             |             |             |
|---|-------------|-------------|-------------|
| C | 1.23619400  | 0.68935900  | -0.06677000 |
| C | 0.04184700  | 1.40249900  | -0.05366200 |
| C | -1.17644500 | 0.73267500  | -0.00453100 |
| C | -1.19971300 | -0.65138700 | 0.03431000  |
| C | -0.00805800 | -1.36547400 | 0.00662200  |
| C | 1.20747100  | -0.69659400 | -0.04855400 |
| H | 2.17657400  | 1.22111200  | -0.07496600 |
| H | -2.08823600 | 1.31239300  | 0.03307900  |
| H | -2.14287800 | -1.17398000 | 0.11231800  |
| H | -0.02629200 | -2.44587000 | 0.05481200  |
| H | 2.13336500  | -1.25476900 | -0.04712600 |
| C | 0.01967000  | 2.88801200  | -0.06826800 |
| O | -0.95942400 | 3.55601300  | -0.27080200 |
| O | 1.22683100  | 3.43391900  | 0.16555900  |
| H | 1.10016500  | 4.38980600  | 0.22791900  |

==> 1\_H\_z+75.gjf <==

|   |             |             |             |
|---|-------------|-------------|-------------|
| C | 1.23619400  | 0.68936000  | 0.06676800  |
| C | 0.04184700  | 1.40250000  | 0.05365000  |
| C | -1.17644500 | 0.73267500  | 0.00451800  |
| C | -1.19971300 | -0.65138800 | -0.03431500 |
| C | -0.00805800 | -1.36547400 | -0.00661700 |

|   |             |             |             |
|---|-------------|-------------|-------------|
| C | 1.20747100  | -0.69659300 | 0.04856000  |
| H | 2.17657300  | 1.22111300  | 0.07496500  |
| H | -2.08823600 | 1.31239300  | -0.03310000 |
| H | -2.14287700 | -1.17398100 | -0.11232500 |
| H | -0.02629100 | -2.44587000 | -0.05480200 |
| H | 2.13336500  | -1.25476800 | 0.04713900  |
| C | 0.01966900  | 2.88801200  | 0.06824800  |
| O | -0.95942500 | 3.55601400  | 0.27077500  |
| O | 1.22683100  | 3.43391800  | -0.16557700 |
| H | 1.10016500  | 4.38980500  | -0.22794400 |

==> 1\_H\_z-80.gjf <==

|   |             |             |             |
|---|-------------|-------------|-------------|
| C | 1.23625500  | 0.68924300  | -0.07126500 |
| C | 0.04199500  | 1.40253000  | -0.05727500 |
| C | -1.17628800 | 0.73295600  | -0.00485900 |
| C | -1.19959400 | -0.65108000 | 0.03663200  |
| C | -0.00810300 | -1.36536100 | 0.00714500  |
| C | 1.20741100  | -0.69669000 | -0.05173400 |
| H | 2.17668500  | 1.22094900  | -0.07997700 |
| H | -2.08794900 | 1.31273000  | 0.03522000  |
| H | -2.14249900 | -1.17335200 | 0.11979100  |
| H | -0.02629100 | -2.44560600 | 0.05860400  |
| H | 2.13325700  | -1.25495500 | -0.05017700 |
| C | 0.02034000  | 2.88808100  | -0.07281500 |
| O | -0.95604700 | 3.55603300  | -0.28882200 |
| O | 1.22440700  | 3.43331200  | 0.17653100  |
| H | 1.09749500  | 4.38892300  | 0.24294300  |

==> 1\_H\_z+80.gjf <==

|   |             |             |             |
|---|-------------|-------------|-------------|
| C | 1.23625400  | 0.68924600  | 0.07124800  |
| C | 0.04199600  | 1.40252700  | 0.05727400  |
| C | -1.17628900 | 0.73296000  | 0.00485000  |
| C | -1.19959200 | -0.65107600 | -0.03663600 |
| C | -0.00810000 | -1.36536300 | -0.00713800 |
| C | 1.20741000  | -0.69669100 | 0.05173600  |
| H | 2.17669300  | 1.22094200  | 0.07997900  |
| H | -2.08795300 | 1.31273000  | -0.03525400 |
| H | -2.14250000 | -1.17335400 | -0.11977500 |
| H | -0.02629700 | -2.44561100 | -0.05858800 |
| H | 2.13326400  | -1.25495000 | 0.05017200  |
| C | 0.02034600  | 2.88808100  | 0.07278700  |
| O | -0.95604900 | 3.55604600  | 0.28875800  |
| O | 1.22440900  | 3.43331000  | -0.17653400 |
| H | 1.09748000  | 4.38891900  | -0.24293700 |

==> 1\_H\_z-85.gjf <==

|   |             |             |             |
|---|-------------|-------------|-------------|
| C | 1.23630900  | 0.68912800  | -0.07577700 |
| C | 0.04215000  | 1.40255700  | -0.06092200 |
| C | -1.17612800 | 0.73326200  | -0.00518100 |
| C | -1.19946400 | -0.65074400 | 0.03897800  |
| C | -0.00814200 | -1.36524500 | 0.00767900  |
| C | 1.20734300  | -0.69679500 | -0.05492500 |
| H | 2.17681600  | 1.22075700  | -0.08507300 |
| H | -2.08766000 | 1.31308200  | 0.03742200  |
| H | -2.14209600 | -1.17268700 | 0.12725600  |
| H | -0.02630200 | -2.44533400 | 0.06241200  |
| H | 2.13316000  | -1.25513300 | -0.05321700 |
| C | 0.02107700  | 2.88815300  | -0.07736100 |
| O | -0.95239900 | 3.55609400  | -0.30691300 |
| O | 1.22180400  | 3.43264700  | 0.18759600  |
| H | 1.09460500  | 4.38797000  | 0.25797000  |

==> 1\_H\_z+85.gjf <==

|   |             |             |             |
|---|-------------|-------------|-------------|
| C | 1.23631000  | 0.68912900  | 0.07577500  |
| C | 0.04214700  | 1.40255700  | 0.06091400  |
| C | -1.17612900 | 0.73326100  | 0.00516400  |
| C | -1.19946400 | -0.65074600 | -0.03898400 |
| C | -0.00814100 | -1.36524400 | -0.00767400 |
| C | 1.20734400  | -0.69679300 | 0.05492700  |
| H | 2.17681300  | 1.22076400  | 0.08506800  |
| H | -2.08766100 | 1.31308200  | -0.03744100 |
| H | -2.14209500 | -1.17269100 | -0.12726400 |
| H | -0.02629700 | -2.44533400 | -0.06239800 |
| H | 2.13315900  | -1.25513400 | 0.05323200  |
| C | 0.02107200  | 2.88815700  | 0.07734400  |
| O | -0.95240200 | 3.55610300  | 0.30688700  |
| O | 1.22180400  | 3.43264100  | -0.18761800 |
| H | 1.09461300  | 4.38796300  | -0.25798900 |

==> 1\_H\_z-90.gjf <==

|   |             |             |             |
|---|-------------|-------------|-------------|
| C | 1.23636300  | 0.68900500  | -0.08031300 |
| C | 0.04230200  | 1.40258900  | -0.06457000 |
| C | -1.17596300 | 0.73357900  | -0.00549800 |
| C | -1.19932700 | -0.65039600 | 0.04133600  |
| C | -0.00818500 | -1.36511900 | 0.00821900  |
| C | 1.20727100  | -0.69690000 | -0.05812400 |
| H | 2.17693500  | 1.22057100  | -0.09017100 |
| H | -2.08735800 | 1.31344600  | 0.03961800  |



|   |             |             |             |
|---|-------------|-------------|-------------|
| H | -2.14166600 | -1.17198700 | 0.13475600  |
| H | -0.02629800 | -2.44504000 | 0.06623500  |
| H | 2.13304900  | -1.25532100 | -0.05628000 |
| C | 0.02184800  | 2.88823300  | -0.08191000 |
| O | -0.94850800 | 3.55617100  | -0.32504000 |
| O | 1.21903400  | 3.43192800  | 0.19869100  |
| H | 1.09157500  | 4.38695300  | 0.27299300  |

==> 1\_H\_z+90.gjf <==

|   |             |             |             |
|---|-------------|-------------|-------------|
| C | 1.23636200  | 0.68900600  | 0.08031400  |
| C | 0.04230200  | 1.40258900  | 0.06456000  |
| C | -1.17596300 | 0.73357900  | 0.00548300  |
| C | -1.19932600 | -0.65039600 | -0.04134500 |
| C | -0.00818500 | -1.36511900 | -0.00821600 |
| C | 1.20727100  | -0.69689900 | 0.05813100  |
| H | 2.17693500  | 1.22057200  | 0.09017600  |
| H | -2.08735700 | 1.31344600  | -0.03964100 |
| H | -2.14166400 | -1.17198700 | -0.13476900 |
| H | -0.02629700 | -2.44504000 | -0.06622700 |
| H | 2.13304900  | -1.25532100 | 0.05629800  |
| C | 0.02184800  | 2.88823400  | 0.08189400  |
| O | -0.94850600 | 3.55617200  | 0.32503300  |
| O | 1.21903100  | 3.43192700  | -0.19872200 |
| H | 1.09157200  | 4.38695200  | -0.27302500 |

==> 1\_H\_z-95.gjf <==

|   |             |             |             |
|---|-------------|-------------|-------------|
| C | 1.23641400  | 0.68887800  | -0.08486300 |
| C | 0.04245700  | 1.40262300  | -0.06822600 |
| C | -1.17579200 | 0.73391100  | -0.00581500 |
| C | -1.19918200 | -0.65003200 | 0.04369900  |
| C | -0.00823000 | -1.36498800 | 0.00876700  |
| C | 1.20719300  | -0.69700900 | -0.06132000 |
| H | 2.17705600  | 1.22037600  | -0.09528600 |
| H | -2.08704400 | 1.31382500  | 0.04182100  |
| H | -2.14121000 | -1.17125000 | 0.14225600  |
| H | -0.02628900 | -2.44473000 | 0.07007200  |
| H | 2.13293200  | -1.25551500 | -0.05933400 |
| C | 0.02266200  | 2.88832000  | -0.08644700 |
| O | -0.94438000 | 3.55626800  | -0.34313800 |
| O | 1.21610200  | 3.43116000  | 0.20977900  |
| H | 1.08838200  | 4.38587600  | 0.28797700  |

==> 1\_H\_z+95.gjf <==

|   |            |            |            |
|---|------------|------------|------------|
| C | 1.23641300 | 0.68887800 | 0.08486200 |
|---|------------|------------|------------|

|   |             |             |             |
|---|-------------|-------------|-------------|
| C | 0.04245700  | 1.40262300  | 0.06821500  |
| C | -1.17579200 | 0.73391100  | 0.00580100  |
| C | -1.19918100 | -0.65003200 | -0.04370500 |
| C | -0.00822900 | -1.36498800 | -0.00876400 |
| C | 1.20719300  | -0.69700800 | 0.06132600  |
| H | 2.17705600  | 1.22037700  | 0.09528600  |
| H | -2.08704300 | 1.31382500  | -0.04184200 |
| H | -2.14120900 | -1.17125100 | -0.14226500 |
| H | -0.02628800 | -2.44473100 | -0.07006400 |
| H | 2.13293200  | -1.25551400 | 0.05934700  |
| C | 0.02266100  | 2.88832000  | 0.08642900  |
| O | -0.94438100 | 3.55626900  | 0.34311600  |
| O | 1.21610200  | 3.43115900  | -0.20979900 |
| H | 1.08838100  | 4.38587500  | -0.28800200 |
